# Supplementary material for: Can MRI measure myelin? Systematic review, qualitative assessment, and meta-analysis of studies validating microstructural imaging with myelin histology
Source: PubMed Central journal article supplement (PMC8063174; doi:10.1016/j.neuroimage.2021.117744), 2021-04-15
Supplement: mmc1.pdf [file mmc1.pdf]

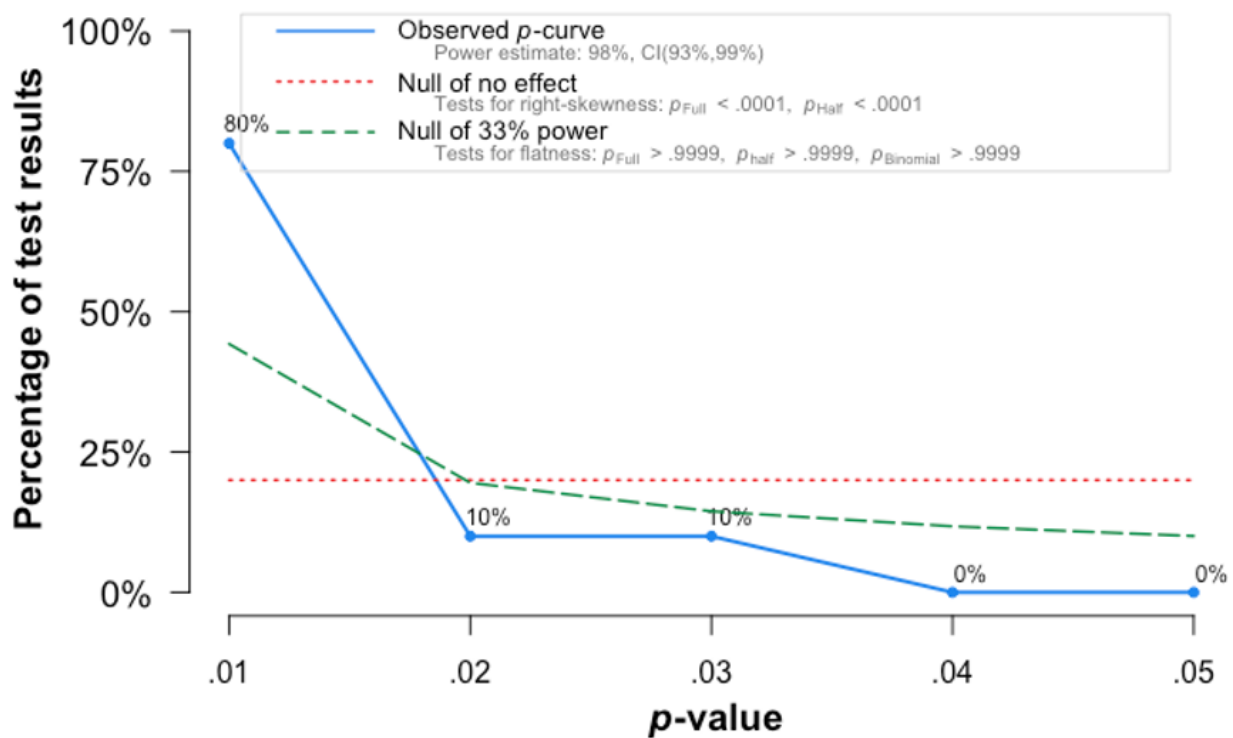

Figure 1: **p-hacking in the validation literature.** In fields where pressure to find significance biases published results p-value distributions tend to be right-skewed, i.e. to be characterized by p-values that are just below the 0.05 significance-threshold. We find evidence that the p-value distribution in the validation literature is, by contrast, left-skewed, with a majority of studies reporting p-values below 0.01.

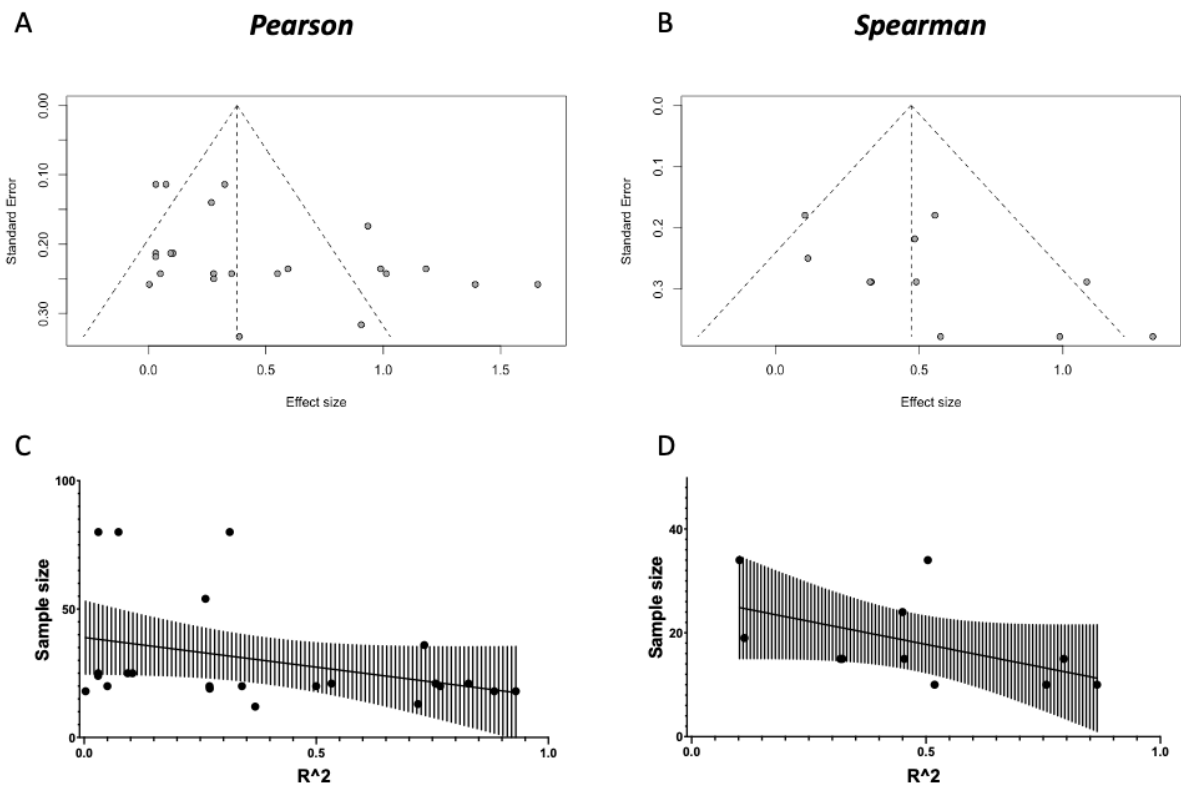

Figure 2: **Publication bias.** [A and B] Funnel plots of the studies in our quantitative meta-analyses (for Pearson and Spearman meta-analyses, respectively). We find some evidence for publication bias against low-sample size, low-effect articles (Eggers test:  $t = 2.419$ ,  $p = 0.02471$  for Pearson;  $t = 2.053$ ,  $p = 0.07025$  for Spearman). [C and D] To further characterize the relationship between Sample Size and Effect Size, we perform a correlation between the two, and find a relationship between higher sample sizes and lower effect sizes (Pearson:  $r = -0.3759$ ,  $p = 0.0771$ ; Spearman:  $r = -0.6451$ ,  $p = 0.0365$ ).

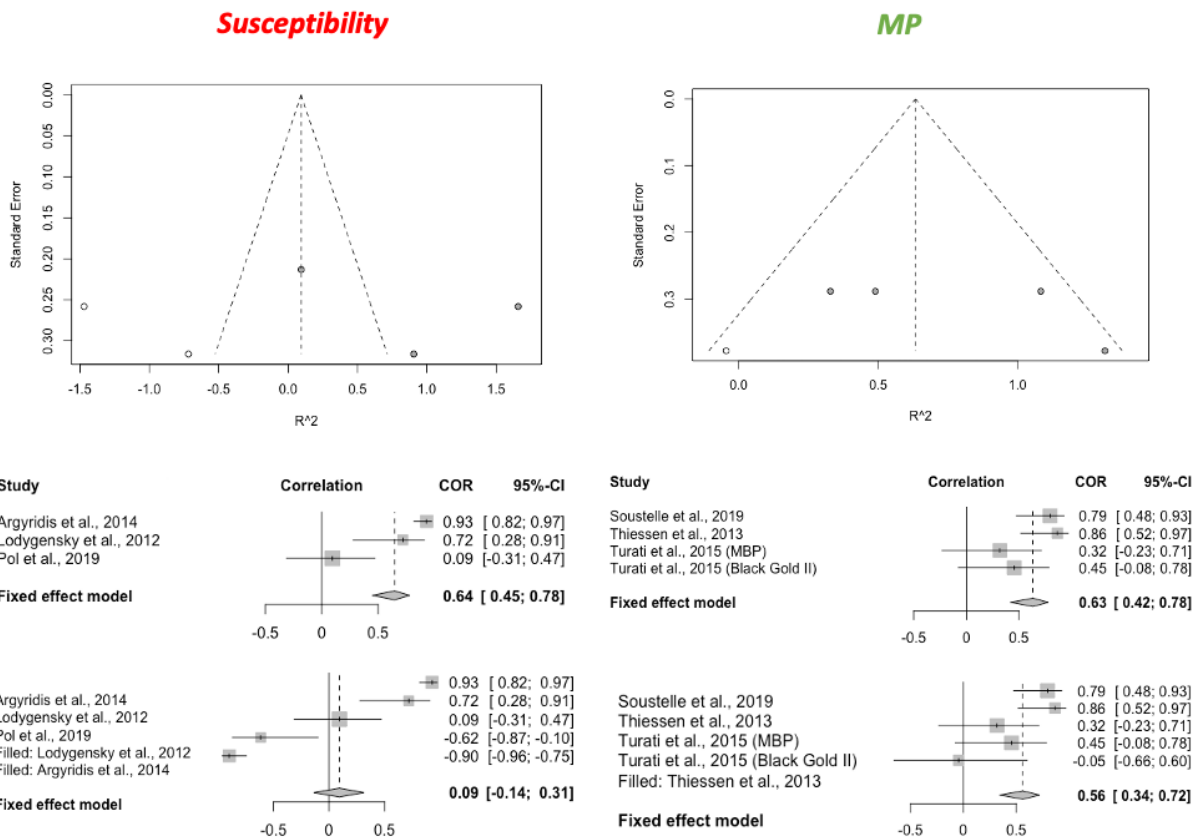

Figure 3: **Trim-and-fill correction for publication bias.** For both susceptibility and MP, we find evidence of publication bias (asymmetric funnel plots, top figures). We then use the trim-and-fill to correct for publication bias by imputing small-effect-small-sample studies that might have been performed, but not published. We then perform a meta-analysis on the imputed set of studies, and compare it to the complete case analysis in the main results.

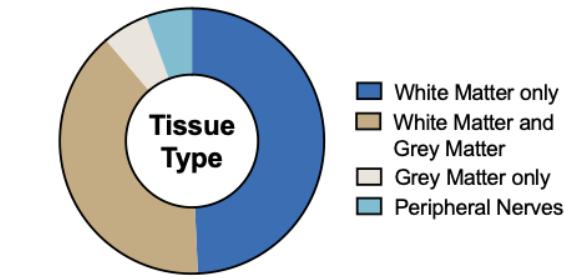

### Magnetization Transfer Ratio (MTR)

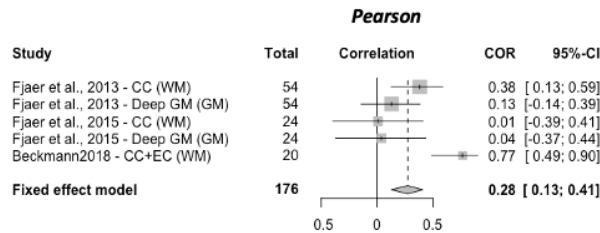

### Macromolecular Pool (MP)

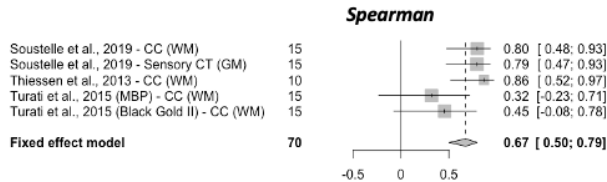

### Fractional Anisotropy (FA)

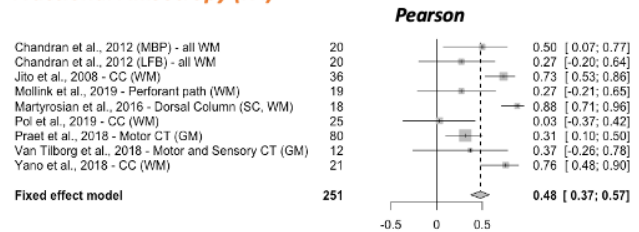

### Mean Diffusivity (MD)

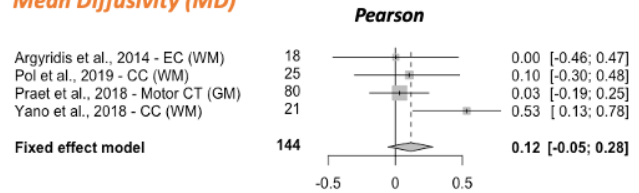

### Radial Diffusivity (RD)

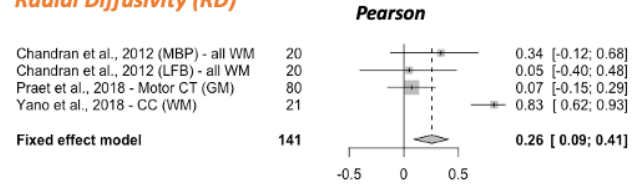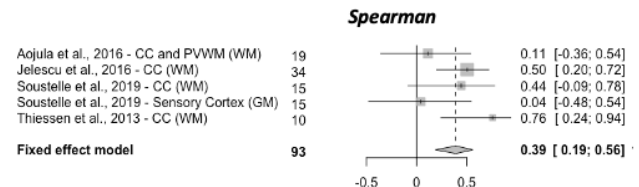

**Figure 4: Influence of tissue type on between-subject meta-analytic results.** (Top left) Within the studies considered by our systematic review ( $n = 71$ ), a majority of studies investigated either White Matter regions only, or in combination with Grey Matter, whereas only a handful of studies focus on Grey Matter on its own. It is therefore unfeasible to analyse WM and GM results separately. (Top right, bottom) Because a minority of studies used for the meta-analyses include GM results, we report the results from these meta-analyses, this time splitting any WM and GM that were pooled in previous analyses. To facilitate visual inspection of this aspect of the literature, we labelled the studies according to tissue type and brain area investigated. We further confirm that excluding GM results (forest plots not shown) does not affect meta-analysis outcomes for any marker, including FA ( $R^2$  without GM = 0.57, 95%CI = [0.44; 0.67]), MP ( $R^2$  without GM = 0.40, 95%CI = [0.22; 0.56]) and MD ( $R^2$  without GM = 0.23, 95%CI = [-0.03; 0.46]). Overall, choice of tissue type being investigated in different studies is unlikely to have affected the results. **Acronyms:** GM: Grey Matter, WM: White Matter, CC: Corpus Callosum, EC: External Capsule, CT: Cortex, SC: Spinal Cord, PVWM: Paraventricular White Matter.

Table 1: **Basic information of the assessed validation studies.** Provided are the species, condition/pathology studied, the tissue structure that underwent MR scanning, post-mortem time (if applicable), regions or tissue types of interest for the analysis and how they were defined. **Acronyms:** ALS: amyotrophic lateral sclerosis; **APP/PS1:** Alzheimer mouse model; **Cuprizone:** Cuprizone-fed mice (D+R: demyelination and remyelination); **EAE:** allergic encephalomyelitis; **Kaolin:** Kaolin was used to induce communicating hydrocephalus; **LPS:** lipopolysaccharide-mediated animal model of MS, **MHII:** mild Hypoxic-Ischemic injury; **MPS:** mucopolysaccharidosis; **MS:** multiple sclerosis; **MSN-ChR2:** optical upregulation of Striatal medium spiny neurons **PLP-GFP:** Proteolipid protein - green fluorescent protein labelled mice; **TBI:** traumatic brain injury; **Thy1-eYFP-H:** mice that endogenously produce fluorescence signal; **TSC:** Tuberosus sclerosis complex; **Shiverer:** Shiverer mice; **SCI:** spinal cord injury; **X-ALD:** X-Linked Adrenoleukodystrophy. **Anatomical structure:** AC: anterior commissure; **BG:** basal ganglia; **CC:** corpus callosum; **CP:** cerebellar peduncle; **CT:** cerebral cortex; **CST:** cortico-spinal tract; **DAWM:** diffusely abnormal white matter; **DWM:** dorsal tegmental tract; **DWM:** diffuse white matter injury; **dGM:** deep gray matter; **GM:** gray matter; **NAWM:** normal appearing white matter; **OT:** optic tract; **PVWM:** Periventricular White Matter; **ST:** striatum; **Th:** Thalamus; **WM:** white matter; **WM-Ls:** white matter lesions.

| Reference                 | Species    | Pathology              | Tissue structure                             | Post-mortem time                                                 | Regions / tissue types of interest                                                                                                  | ROI definition           |
|---------------------------|------------|------------------------|----------------------------------------------|------------------------------------------------------------------|-------------------------------------------------------------------------------------------------------------------------------------|--------------------------|
| Choi et al. (2015)        | Dog        | MPS type 1 and Control | Whole brain                                  | NA                                                               | ROIs across the brain, including WM and GM                                                                                          | manual                   |
| Wei et al. (2013)         | Dog        | Controls               | Whole brain                                  | NA                                                               | ROIs across the brain, including WM and GM                                                                                          | manual                   |
| Gareau et al. (2000)      | Guinea pig | EAE and Controls       | Brain slice                                  | NA                                                               | NAWM in CC                                                                                                                          | manual                   |
| Bagnato et al. (2018)     | Human      | MS                     | 1 cm coronal slices                          | 4-83 hours                                                       | NAWM, DWMI, WM-Ls, thalamus, dGM, normal cortex                                                                                     | manual                   |
| Bot et al. (2004)         | Human      | MS and Controls        | Cervical spinal cord                         | 8.2±1.7 hours                                                    | WM-Ls, NAWM, WM                                                                                                                     | manual                   |
| Grussu et al. (2017)      | Human      | MS and Controls        | Upper thoracic and upper lumbar spinal cord  | not reported                                                     | GM, WM, lesional vs nonlesional                                                                                                     | manual                   |
| Hametner et al. (2018)    | Human      | Controls               | Whole brain                                  | range: 72-192 hours                                              | WM, CT, Th, BG                                                                                                                      | manual                   |
| Laule et al. (2008)       | Human      | MS                     | 1 cm brain sections                          | not reported                                                     | WM, GM and lesions                                                                                                                  | manual                   |
| Laule et al. (2006)       | Human      | MS                     | 1 cm brain sections                          | not reported                                                     | WM, GM and lesions                                                                                                                  | manual                   |
| Laule et al. (2011)       | Human      | MS                     | 1 cm brain sections                          | not reported                                                     | DAWM and NAWM                                                                                                                       | manual                   |
| Moll et al. (2011)        | Human      | MS                     | Whole brain                                  | 5.8±1 hours                                                      | WM, considering distance from lesion                                                                                                | manual                   |
| Mollink et al. (2019)     | Human      | ALS and controls       | Brain tissue blocks including hippocampus    | range: 0.5-5 days                                                | Perforant path                                                                                                                      | tractography / manual    |
| Mottershead et al. (2003) | Human      | MS and Controls        | Spinal cord, 2 cm pieces                     | 72±39.2                                                          | MS lesions, diffuse damage, NAWM                                                                                                    | manual                   |
| Peters et al. (2019)      | Human      | Tuberculosis           | Whole brain                                  | NA                                                               | Surgically removed tissue blocks                                                                                                    | NA                       |
| Reeves et al. (2015)      | Human      | Epilepsy and Control   | 5 mm thick piece of cortex and underlying WM | 0 (samples obtained during surgery)                              | Normal and pathological GM and WM                                                                                                   | manual                   |
| Righart et al. (2017)     | Human      | MS                     | Whole brain                                  | ≤ 7 hours                                                        | Left inferior frontal gyrus, superior frontal gyrus, anterior cingulate gyrus, inferior parietal gyrus, and superior temporal gyrus | atlas (Freesurfer apart) |
| Schmierer et al. (2010)   | Human      | MS                     | 1 cm coronal brain slices                    | 42±32 hours                                                      | Cortical GM lesions and nonlesional CT                                                                                              | manual                   |
| Schmierer et al. (2004)   | Human      | MS                     | 1 cm coronal brain slices                    | 14.2±8.5 hours                                                   | WM-Ls and NAWM                                                                                                                      | manual                   |
| Schmierer et al. (2007a)  | Human      | MS                     | Coronal brain slices                         | 15±8 (range: 4.5-43) hours, scanning: 43±22 (range 10-107) hours | WM-Ls and NAWM                                                                                                                      | manual                   |

Continued on next page

**Table 1: Basic information of the assessed validation studies.** Provided are the species, condition/pathology studied, the tissue structure that underwent MR scanning, post-mortem time (if applicable), regions or tissue types of interest for the analysis and how they were defined. **Acronyms:** **ALS:** amyotrophic lateral sclerosis; **APP/PS1:** Alzheimer mouse model; **Cuprizone:** Cuprizone-fed mice (D+R: demyelination and remyelination); **EAE:** allergic encephalomyelitis; **Kaolin:** Kaolin was used to induce communicating hydrocephalus; **LPS:** lipopolysaccharide-mediated animal model of MS, **MHIE:** mild Hypoxic-Ischemic injury; **MPS:** mucopolysaccharidosis; **MS:** multiple sclerosis; **MSN-ChR2:** optical upregulation of Striatal medium spiny neurons **PLP-GFP:** Proteolipid protein - green fluorescent protein labelled mice; **TBI:** traumatic brain injury; **Thy1-eYFP-H:** mice that endogenously produce fluorescence signal; **TSC:** Tuberosus sclerosis complex; **Shiverer:** Shiverer mice; **SCI:** spinal cord injury; **X-ALD:** X-Linked Adrenoleukodystrophy. **Anatomical structure:** **AC:** anterior commissure; **BG:** basal ganglia; **CC:** corpus callosum; **CP:** cerebellar peduncle; **CT:** cerebral cortex; **CST:** cortico-spinal tract; **DAWM:** diffusely abnormal white matter; **DWT:** dorsal tegmental tract; **DWM:** diffuse white matter injury; **dGM:** deep gray matter; **GM:** gray matter; **NAWM:** normal appearing white matter; **OT:** optic tract; **PVWM:** Periventricular White Matter; **ST:** striatum; **Th:** Thalamus; **WM:** white matter; **WM-Ls:** white matter lesions.

| Reference                   | Species | Pathology                     | Tissue structure                                                                              | Post-mortem time                                                      | Regions / tissue types of interest                   | ROI definition             |
|-----------------------------|---------|-------------------------------|-----------------------------------------------------------------------------------------------|-----------------------------------------------------------------------|------------------------------------------------------|----------------------------|
| Schmierer et al. (2007b)    | Human   | MS                            | 1 cm coronal brain slices                                                                     | 16±6 (range: 7-28) hours; scanning: 46±25 (range: 10-107) hours       | WM-Ls and NAWM                                       | manual                     |
| Schmierer et al. (2008)     | Human   | MS                            | 1 cm coronal brain slices                                                                     | 17±6 (range: 7-28) hours; unfixed samples: 51±28 (range: 7-108) hours | WM-Ls and NAWM                                       | manual                     |
| Seehaus et al. (2015)       | Human   | Control                       | Whole brain                                                                                   | 6 hours                                                               | CT and WM                                            | NA                         |
| Seewann et al. (2009)       | Human   | MS                            | 1 cm coronal brain slices                                                                     | mean: 8.5 hours                                                       | WM-Ls, DAWM and NAWM                                 | manual                     |
| Stüber et al. (2014)        | Human   | Controls                      | Brain tissue blocks (pre/postcentral gyrus, posterior occipital lobe and subthalamic nucleus) | 36 and 28 hours                                                       | GM and WM                                            | NA                         |
| van der Voorn et al. (2011) | Human   | X-ALD and Controls            | Coronal brain tissue sections                                                                 | not reported                                                          | Areas with complete or active demyelination and NAWM | manual                     |
| Wang et al. (2015)          | Human   | MS                            | Section of cervical spinal cord                                                               | <10 hours                                                             | Voxels with positive histological staining           | random selection of voxels |
| Warmtjes et al. (2017)      | Human   | Controls                      | 2 cm brain slices (one through caudate nucleus and one through thalamus)                      | 20 hours to 3 days range (duration which body was refrigerated)       | GM and WM                                            | NA                         |
| Abe et al. (2019)           | Mouse   | MSN-ChR2 mice                 | Whole brain                                                                                   | NA                                                                    | dGM, CT                                              | manual                     |
| Argyridis et al. (2014)     | Mouse   | Different neonatal stages     | Whole brain                                                                                   | NA                                                                    | EC                                                   | manual                     |
| Beckmann et al. (2018)      | Mouse   | Cuprizone                     | Whole brain                                                                                   | NA                                                                    | CC, EC (within same ROI)                             | not reported               |
| Chandran et al. (2012)      | Mouse   | Cuprizone                     | Whole brain                                                                                   | NA                                                                    | WM                                                   | atlas-based                |
| Chang et al. (2017b)        | Mouse   | Controls                      | Whole brain                                                                                   | NA                                                                    | Various WM tracts                                    | manual                     |
| Chang et al. (2017a)        | Mouse   | Thy1-eYFP-H mice and Controls | Whole brain                                                                                   | NA                                                                    | Various WM tracts                                    | manual                     |
| Duhamel et al. (2019)       | Mouse   | plp-GFP mice and Controls     | Whole brain                                                                                   | NA                                                                    | ROIs across the brain, including WM and GM           | manual                     |
| Fatemi et al. (2011)        | Mouse   | Ischemic injury and control   | Whole brain                                                                                   | NA                                                                    | CC, IC, CP                                           | manual                     |
| Fjer et al. (2013)          | Mouse   | Cuprizone and Controls        | Whole brain                                                                                   | NA                                                                    | CC, dGM, olfactory bulb, cerebellum and CT           | manual                     |

Continued on next page

Table 1: **Basic information of the assessed validation studies.** Provided are the species, condition/pathology studied, the tissue structure that underwent MR scanning, post-mortem time (if applicable), regions or tissue types of interest for the analysis and how they were defined. **Acronyms:** ALS: amyotrophic lateral sclerosis; **APP/PS1:** Alzheimer mouse model; **Cuprizone:** Cuprizone-fed mice (D+R: demyelination and remyelination); **EAE:** allergic encephalomyelitis; **Kaolin:** Kaolin was used to induce communicating hydrocephalus; **LPS:** lipopolysaccharide-mediated animal model of MS, **MHIE:** mild Hypoxic-Ischemic injury; **MPS:** mucopolysaccharidosis; **MS:** multiple sclerosis; **MSN-ChR2:** optical upregulation of Striatal medium spiny neurons **PLP-GFP:** Proteolipid protein - green fluorescent protein labelled mice; **TBI:** traumatic brain injury; **Thy1-eYFP-H:** mice that endogenously produce fluorescence signal; **TSC:** Tuberosus sclerosis complex; **Shiverer:** Shiverer mice; **SCI:** spinal cord injury; **X-ALD:** X-Linked Adrenoleukodystrophy. **Anatomical structure:** AC: anterior commissure; **BG:** basal ganglia; **CC:** corpus callosum; **CP:** corpus callosum; **CT:** cerebellar peduncle; **CT:** cerebellar cortex; **CST:** cortico-spinal tract; **DAWM:** diffusely abnormal white matter; **DTT:** dorsal tegmental tract; **DWM:** diffuse white matter injury; **dGM:** deep gray matter; **GM:** gray matter; **NAWM:** normal appearing white matter; **OT:** optic tract; **PVWM:** Periventricular White Matter; **ST:** striatum; **Th:** Thalamus; **WM:** white matter; **WM-Ls:** white matter lesions.

| Reference                 | Species | Pathology                                 | Tissue structure              | Post-mortem time | Regions / tissue types of interest                       | ROI definition                                 |
|---------------------------|---------|-------------------------------------------|-------------------------------|------------------|----------------------------------------------------------|------------------------------------------------|
| Fjer et al. (2015)        | Mouse   | EAE                                       | Whole brain                   | NA               | CC, dGM, olfactory bulb, cerebellum, CT                  | semi-automated                                 |
| Jelescu et al. (2016)     | Mouse   | Cuprizone and controls                    | Whole brain                   | NA               | CC splenium                                              | semi-automated                                 |
| Kelm et al. (2016)        | Mouse   | TSC / Rictor                              | Whole brain                   | NA               | CC midbody, CC genu, CC splenium (SCC), AC, EC, IC       | manual                                         |
| Khodanovich et al. (2017) | Mouse   | Cuprizone (D+R) and Controls              | Whole brain                   | NA               | GM and WM                                                | manual                                         |
| Khodanovich et al. (2019) | Mouse   | Cuprizone (D+R) and Controls              | Whole brain                   | NA               | ROIs across the brain, including WM and GM               | manual                                         |
| Pol et al. (2019)         | Mouse   | Telflumamide and Controls                 | Whole brain                   | NA               | CC (caudal medial, rostral lateral, rostral medial)      | manual                                         |
| Praet et al. (2018)       | Mouse   | APP/PS1 and controls                      | Whole brain                   | NA               | Motor cortex                                             | manual on study based atlas                    |
| Soni et al. (2020)        | Mouse   | TBI and Controls                          | Whole brain                   | NA               | Middle CC, CC-EC ipsilateral and contralateral to injury | AMBMC mouse atlas / Allen mouse atlas          |
| Soustelle et al. (2019)   | Mouse   | Cuprizone and Controls                    | Whole brain                   | NA               | Medial and lateral CC, CT                                | manual                                         |
| Sundberg et al. (2010)    | Mouse   | SCI and Controls                          | Spinal cord                   | NA               | Area centred on injury                                   | manual                                         |
| Thiessen et al. (2013)    | Mouse   | Cuprizone and Controls                    | Whole brain                   | NA               | CC                                                       | manual                                         |
| Turati et al. (2015)      | Mouse   | Cuprizone (D+R) and Controls              | Whole brain                   | NA               | CC                                                       | manual                                         |
| West et al. (2018)        | Mouse   | Genetic model for hyper-/hypomyelination  | Whole brain                   | NA               | CC, AC, CT                                               | manual                                         |
| Yano et al. (2018)        | Mouse   | Cuprizone (D+R) and Controls              | Whole brain                   | NA               | CC                                                       | manual                                         |
| Aojula et al. (2016)      | Rat     | Kaolin-induced hydrocephalus and Controls | Whole brain                   | NA               | CC and PVWM                                              | manual for histology, coordinate-based for MRI |
| Chen et al. (2017)        | Rat     | SCI                                       | 3 mm spinal cord sections     | NA               | Fasciculus gracilis                                      | manual                                         |
| Janve et al. (2013)       | Rat     | LPS and control                           | Whole brain                   | NA               | CC                                                       | not reported                                   |
| Jespersen et al. (2010)   | Rat     | Controls                                  | Whole brain                   | NA               | ROIs across the brain, including WM and GM               | manual                                         |
| Kozlowski et al. (2008)   | Rat     | SCI and Controls                          | Spinal cord                   | NA               | Fasciculus gracilis, fasciculus cuneatus, and CST        | manual                                         |
| Lehto et al. (2017)       | Rat     | Controls                                  | Whole brain                   | NA               | Contralateral and ipsilateral CC and DTT                 | manual                                         |
| Lodygensky et al. (2012)  | Rat     | Controls                                  | Whole brain                   | NA               | AC, CC                                                   | manual                                         |
| Martirosyan et al. (2016) | Rat     | SCI                                       | Spinal cord (T9)              | NA               | Epicenter of injury                                      | manual                                         |
| Oakden et al. (2015)      | Rat     | SCI                                       | Caudal end of the C2 vertebra | NA               | WM                                                       | manual                                         |

Continued on next page



Table 1: **Basic information of the assessed validation studies.** Provided are the species, condition/pathology studied, the tissue structure that underwent MR scanning, post-mortem time (if applicable), regions or tissue types of interest for the analysis and how they were defined. **Acronyms:** ALS: amyotrophic lateral sclerosis; **APP/PS1:** Alzheimer mouse model; **Cuprizone:** Cuprizone-fed mice (D+R: demyelination and remyelination); **EAE:** allergic encephalomyelitis; **Kaolin:** Kaolin was used to induce communicating hydrocephalus; **LPS:** lipopolysaccharide-mediated animal model of MS, **MHII:** mild Hypoxic-Ischemic injury; **MPS:** mucopolysaccharidosis; **MS:** multiple sclerosis; **MSN-ChR2:** optical upregulation of Striatal medium spiny neurons **PLP-GFP:** Proteolipid protein - green fluorescent protein labelled mice; **TBI:** traumatic brain injury; **Thy1-eYFP-H:** mice that endogenously produce fluorescence signal; **TSC:** Tuberosus sclerosis complex; **Shiverer:** Shiverer mice; **SCI:** spinal cord injury; **X-ALD:** X-Linked Adrenoleukodystrophy. **Anatomical structure:** AC: anterior commissure; **BG:** basal ganglia; **CC:** corpus callosum; **CP:** cerebellar peduncle; **CT:** cerebral cortex; **CST:** cortico-spinal tract; **DAWM:** diffusely abnormal white matter; **DWT:** dorsal tegmental tract; **DWMI:** diffuse white matter injury; **dGM:** deep gray matter; **GM:** gray matter; **NAWM:** normal appearing white matter; **OT:** optic tract; **PVWM:** Periventricular White Matter; **ST:** striatum; **Th:** Thalamus; **WM:** white matter; **WM-Ls:** white matter lesions.

| Reference                                 | Species | Pathology                                | Tissue structure              | Post-mortem time | Regions / tissue types of interest         | ROI definition             |
|-------------------------------------------|---------|------------------------------------------|-------------------------------|------------------|--------------------------------------------|----------------------------|
| <a href="#">Odrobina et al. (2005)</a>    | Rat     | Tellerium diet and Controls              | Sciatic nerves                | NA               | Distal and proximal portion of nerve       | not reported               |
| <a href="#">Pun et al. (2005)</a>         | Rat     | Tellerium and Controls                   | 2 cm pieces of sciatic nerves | NA               | Nerves                                     | unclear                    |
| <a href="#">Schwartz et al. (2005)</a>    | Rat     | Controls                                 | Whole brain                   | NA               | Various WM tracts                          | manual                     |
| <a href="#">Takagi et al. (2009)</a>      | Rat     | Injury                                   | Sciatic nerve                 | NA               | Individual nerves                          | random selection of nerves |
| <a href="#">Tu et al. (2016)</a>          | Rat     | TBI                                      | Whole brain                   | NA               | AC, CC, CT, CP, EC, PT, ST                 | manual                     |
| <a href="#">Underhill et al. (2011)</a>   | Rat     | C6 glioma model and Controls             | Whole brain                   | NA               | ROIs across the brain, including WM and GM | manual                     |
| <a href="#">van Tilborg et al. (2018)</a> | Rat     | Fetal inflammation and postnatal hypoxia | Whole brain                   | NA               | Motor cortex (M1, M2), sensory cortex      | atlas-based                |
| <a href="#">Wang et al. (2009)</a>        | Rat     | MHII                                     | Whole brain                   | NA               | EC (ipsilesional and contralesional)       | manual                     |
| <a href="#">Webb et al. (2003)</a>        | Rat     | Nerve injury and Controls                | Sciatic nerve                 | NA               | Sections of individual nerves              | manual                     |
| <a href="#">Hakkarainen et al. (2016)</a> | Rats    | Controls                                 | Whole brain                   | NA               | ROIs across the brain                      | not reported               |
| <a href="#">Jito et al. (2008)</a>        | Rats    | 6 postnatal stages                       | Whole brain                   | NA               | CC                                         | manual                     |
| <a href="#">Kozlowski et al. (2014)</a>   | Rats    | SCI                                      | Spinal cord                   | NA               | Dorsal column                              | manual                     |

Table 2: **Information on MRI imaging of the assessed validation studies.** Provided are imaging modality, field strength in Tesla (T), imaging resolution in terms of voxel size, and the tissue state and temperature during scanning. **Acronyms:** **Imaging:** **DWI:** Diffusion-weighted imaging; **AK:** axial kurtosis; **AI:** Anisotropy Index (tADC/tADC); **DBSI-RD:** diffusion basis spectrum imaging - based radial diffusivity; **DK:** diffusion kurtosis metrics; **DT:** diffusion tensor metrics; **FA:** fractional anisotropy (from diffusion tensor model); **IADC:** longitudinal apparent diffusion coefficient (not modelled with tensor); **MD:** mean diffusivity (from diffusion tensor model); **MK:** mean kurtosis; **RD:** radial / transverse diffusivity (from diffusion tensor model); **RK:** radial kurtosis; **SDI:** diffusion standard deviation index; **tADC:** transverse apparent diffusion coefficient (not modelled with tensor); **Relaxometry:** **MWF:** myelin water fraction; **RI:** longitudinal relaxation rate; **R2\*:** effective transverse relaxation rate; **RAFF4:** Relaxation Along a Fictitious Field in the rotating frame of rank 4; **T1:** longitudinal relaxation time; **T2:** transverse relaxation time; **T2\*:** effective transverse relaxation time; **MT:** magnetisation transfer; **BPF:** bound pool fraction; **F:** pool size ratio; **Fb:** macromolecular proton fraction; **ih-MTR:** MTR from inhomogeneous MT; **M0b:** fraction of magnetization that resides in the semi-solid pool and undergoes MT exchange; **MP:** macromolecular pool; **MPF:** macromolecular proton fraction; **MTR:** magnetisation transfer ratio; **PSR:** Macromolecular-to-free-water pool-size-ratio; **STE-MT:** MTR based on short echo time imaging; **T1sat:** T1 of saturated pool; **UTE-MTR:** MTR based on ultrashort echo time imaging; **QSM:** quantitative susceptibility mapping; **Others:** **rSPF:** relative semi-solid proton fraction from an 3D ultrashort echo time (UTE) sequence within an appropriate water suppression condition; **T1w/T2w:** ratio of image intensity in a T1-weighted vs T2-weighted acquisition.

| Reference                               | Modality | Metrics        | T    | Resolution (mm)          | Tissue state    | Temperature      |
|-----------------------------------------|----------|----------------|------|--------------------------|-----------------|------------------|
| <a href="#">Abe et al. (2019)</a>       | DWI      | AD, FA, RD     | 7    | 0.125 x 0.125 x 0.125 mm | perfusion fixed | not reported     |
| <a href="#">Aojula et al. (2016)</a>    | DWI      | AD, FA, MD, RD | 7    | 0.195 x 0.195 x 1mm      | in vivo         | body temperature |
| <a href="#">Argyridis et al. (2014)</a> | DWI      | MD             | 9.4  | unclear                  | perfusion fixed | not reported     |
| <a href="#">Chandran et al. (2012)</a>  | DWI      | FA, RD         | 7    | 0.2 x 0.2 x 1 mm         | in vivo         | body temperature |
| <a href="#">Chang et al. (2017b)</a>    | DWI      | FA, AD, RD     | 11.7 | 0.1 mm isotropic         | perfusion fixed | 28°C             |
| <a href="#">Chang et al. (2017a)</a>    | DWI      | FA, AD, RD, MD | 11.7 | 0.1 mm isotropic         | perfusion fixed | 28°C             |
| <a href="#">Choi et al. (2015)</a>      | DWI      | FA, RD         | 7    | 0.1 mm isotropic         | fixed           | not reported     |

Continued on next page



Table 2: **Information on MRI imaging of the assessed validation studies.** Provided are imaging modality, field strength in Tesla (T), imaging resolution in terms of voxel size, and the tissue state and temperature during scanning. **Acronyms: Imaging: DWI: Diffusion-weighted imaging; AK: axial kurtosis; AI: Anisotropy Index (tADC/tADC); DBSI-RD: diffusion basis spectrum imaging - based radial diffusivity; DK: diffusion kurtosis metrics; DT: diffusion tensor metrics; FA: fractional anisotropy (from diffusion tensor model); IADC: longitudinal apparent diffusion coefficient (not modelled with tensor); MD: mean diffusivity (from diffusion tensor model); MK: mean kurtosis; RD: radial / transverse diffusivity (from diffusion tensor model); RK: radial kurtosis; SDI: diffusion standard deviation index; tADC: transverse apparent diffusion coefficient (not modelled with tensor); Relaxometry: MWF: myelin water fraction; R1: longitudinal relaxation time; T2\*: effective transverse relaxation rate; RAFF4: Relaxation Along a Fictitious Field in the rotating frame of rank 4; T1: longitudinal relaxation time; T2: transverse relaxation time; T2\*: effective transverse relaxation time; MT: magnetisation transfer; BPF: bound pool fraction; F: pool size ratio; Fb: macromolecular proton fraction; MPPF: macromolecular proton fraction; MTR: magnetisation transfer ratio; PSR: Macromolecular-to-free-water pool-size-ratio; STE-MT: MTR and undergoes MT exchange; MP: macromolecular pool; MTR: MTR based on ultrashort echo time imaging; QSM: quantitative susceptibility mapping; Others: rSPF: relative semi-solid based on short echo time imaging; T1sat: T1 of saturated pool; UTE-MTR: MTR based on ultrashort echo time imaging; T1w/T2w: ratio of image intensity in a T1-weighted vs T2-weighted acquisition. proton fraction from an 3D ultrashort echo time (UTE) sequence within an appropriate water suppression condition; T1w/T2w: ratio of image intensity in a T1-weighted vs T2-weighted acquisition.**

| Reference                 | Modality | Metrics                              | T    | Resolution (mm)                                                      | Tissue state                          | Temperature                     |
|---------------------------|----------|--------------------------------------|------|----------------------------------------------------------------------|---------------------------------------|---------------------------------|
| Grussu et al. (2017)      | DWI      | AD, FA, MD, RD                       | 9.4  | 0.2 x 0.2 x 2 mm                                                     | fixed                                 | 35°C                            |
| Janve et al. (2013)       | DWI      | AD, FA, RD                           | 9.4  | 0.167 x 0.167 x 0.167 mm                                             | perfusion fixed                       | not reported                    |
| Jelescu et al. (2016)     | DWI      | RD, RK                               | 7    | 0.112 x 0.112 x 0.8 mm                                               | in vivo                               | body temperature                |
| Jespersen et al. (2010)   | DWI      | FA*                                  | 16.4 | 0.1 x 0.1 x 0.5 mm                                                   | perfusion fixed                       | 21°C                            |
| Jito et al. (2008)        | DWI      | FA                                   | 7    | 0.117 x 0.24 x 1 mm                                                  | in vivo                               | body temperature                |
| Kelm et al. (2016)        | DWI      | FA, MD, RD, MK, AK, RK               | 15.2 | 0.15 x 0.15 x 0.15 mm                                                | perfusion fixed                       | 17 ± 0.5 °C                     |
| Kozlowski et al. (2008)   | DWI      | FA, AD, MD, RD                       | 7    | 1 x 1 x 1 mm                                                         | perfusion fixed                       | not reported                    |
| Kozlowski et al. (2014)   | DWI      | FA                                   | 7    | 1 x 1 x 1 mm (only ex vivo)                                          | in vivo (relaxometry) and fixed (DWI) | body temperature / not reported |
| Lehto et al. (2017)       | DWI      | AD, FA, MD, RD                       | 7    | 0.125 x 0.125 x 0.5 mm                                               | in vivo                               | body temperature                |
| Martirosyan et al. (2016) | DWI      | FA                                   | 7    | 0.195 x 0.195 x 10 mm                                                | perfusion fixed                       | not reported                    |
| Moll et al. (2011)        | DWI      | AD, FA, MD, RD                       | 1.5  | 1.9 1.9 3 mm                                                         | in situ / fixed                       | body temperature                |
| Mollink et al. (2019)     | DWI      | FA, MD, RD, AD                       | 11.7 | 0.4 x 0.4 x 0.4 mm resolution.                                       | fixed                                 | not reported                    |
| Mottershead et al. (2003) | DWI      | ADC, SDI                             | 7    | Single 1.5 mm slices, in plane resolution between 0.055 and 0.068 mm | fresh                                 | 29-38°C                         |
| Oakden et al. (2015)      | DWI      | AD, RD                               | 1.5  | 0.2 0.2 x 1 mm                                                       | in vivo / fixed                       | body temperature                |
| Peters et al. (2019)      | DWI      | FA, MD                               | 3    | 1.72 x 1.72 x 2.2 mm                                                 | in vivo                               | body temperature                |
| Pol et al. (2019)         | DWI      | FA, MD                               | 9.4  | 0.078 0.078 0.250 mm                                                 | in vivo                               | body temperature                |
| Praet et al. (2018)       | DWI      | AD, AK, DT, DK, FA, MD, MK, RD, RK   | 7    | 0.000214 x 0.000214 x 0.2 mm                                         | in vivo                               | body temperature (37-37.3°C)    |
| Schmierer et al. (2007b)  | DWI      | FA, MD                               | 1.5  | 2.5 x 2.5 x 5 mm                                                     | fresh                                 | 17.5 - 25.1°C                   |
| Schmierer et al. (2008)   | DWI      | AD, FA, MD, RD                       | 1.5  | 0.25 x 0.25 x 5 mm                                                   | fresh / fixed                         | 22.5°C                          |
| Schwartz et al. (2005)    | DWI      | AI, iADC, tADC                       | 9.4  | 0.039 x 0.039 x 0.5 mm                                               | perfusion fixed                       | 20°C                            |
| Seehaus et al. (2015)     | DWI      | FA                                   | 9.4  | 0.34 x 0.34 x 0.34 mm                                                | fixed                                 | 30 °C                           |
| Seewam et al. (2009)      | DWI      | FA, ADC                              | 1.5  | 2 x 2 x 8 mm                                                         | fixed                                 | not reported                    |
| Soustelle et al. (2019)   | DWI      | RD                                   | 7    | 0.1 x 0.1 x 0.750 mm                                                 | perfusion fixed                       | room temperature (20°C)         |
| Sundberg et al. (2010)    | DWI      | AD, FA, RD                           | 7    | 0.2 x 0.2 x 1 mm                                                     | in vivo                               | 37°C                            |
| Takagi et al. (2009)      | DWI      | FA                                   | 7    | 0.31 x 0.31 x 0.94 mm                                                | excised                               | not reported                    |
| Thiessen et al. (2013)    | DWI      | AD, FA, RD                           | 7    | 0.098 0.098 0.750 mm                                                 | perfusion fixed                       | room temperature                |
| Tu et al. (2016)          | DWI      | AD, FA, MD, RD, MTR at different ppm | 7    | DWI: 0.2 x 0.2 x 0.2 mm; MF: 0.2 x 0.2 x 0.5 mm;                     | in vivo                               | body temperature                |

Continued on next page

Table 2: **Information on MRI imaging of the assessed validation studies.** Provided are imaging modality, field strength in Tesla (T), imaging resolution in terms of voxel size, and the tissue state and temperature during scanning. **Acronyms: Imaging: DWI: Diffusion-weighted imaging; AK: axial kurtosis; AI: Anisotropy Index (tADC/tADC); DBSI-RD: diffusion basis spectrum imaging - based radial diffusivity; DK: diffusion kurtosis metrics; DT: diffusion tensor metrics; FA: fractional anisotropy (from diffusion tensor model); IADC: longitudinal apparent diffusion coefficient (not modelled with tensor); MD: mean diffusivity (from diffusion tensor model); MK: mean kurtosis; RD: radial / transverse diffusivity (from diffusion tensor model); RK: radial kurtosis; SDI: diffusion standard deviation index; tADC: transverse apparent diffusion coefficient (not modelled with tensor); Relaxometry: MWF: myelin water fraction; R1: longitudinal relaxation time; T2\*: effective transverse relaxation rate; RAFF4: Relaxation Along a Fictitious Field in the rotating frame of rank 4; T1: longitudinal relaxation time; T2: transverse relaxation time; T2\*: effective transverse relaxation time; MT: magnetisation transfer; BPF: bound pool fraction; F: pool size ratio; Fb: macromolecular proton fraction; ih-MTR: MTR from inhomogeneous MT; M0b: fraction of magnetization that resides in the semi-solid pool and undergoes MT exchange; MP: macromolecular pool; MPF: macromolecular proton fraction; MTR: magnetisation transfer ratio; PSR: Macromolecular-to-free-water pool-size-ratio; STE-MT: MTR based on short echo time imaging; T1sat: T1 of saturated pool; UTE-MTR: MTR based on ultrashort echo time imaging; QSM: quantitative susceptibility mapping; Others: rSPF: relative semi-solid proton fraction from an 3D ultrashort echo time (UTE) sequence within an appropriate water suppression condition; T1w/T2w: ratio of image intensity in a T1-weighted vs T2-weighted acquisition.**

| Reference                   | Modality | Metrics             | T     | Resolution (mm)                                                                              | Tissue state    | Temperature                |
|-----------------------------|----------|---------------------|-------|----------------------------------------------------------------------------------------------|-----------------|----------------------------|
| van der Voorn et al. (2011) | DWI      | ADC, FA             | 1.5   | 2 x 2 x 8 mm                                                                                 | fixed           | room temperature (20-22°C) |
| van Tilborg et al. (2018)   | DWI      | FA, RD              | 9.4   | 0.15 x 0.15 x 0.148 mm                                                                       | perfusion fixed | not reported               |
| Wang et al. (2009)          | DWI      | AD, FA, RD, "Trace" | 7     | Varying resolution: 0.250 x 0.250 x 0.5 mm for some scans, 0.313 x 0.313 x 0.7 mm for others | in vivo         | body temperature           |
| Wang et al. (2015)          | DWI      | DBSI-RD             | 4.7   | 0.250 x 0.250 x 0.5 mm                                                                       | fixed           | 17°C                       |
| Wei et al. (2013)           | DWI      | FA, RD              | 7     | 0.1 mm isotropic                                                                             | perfusion fixed | not reported               |
| Yano et al. (2018)          | DWI      | FA, MD, RD          | 7     | 0.125 x 0.125 x 0.125 mm                                                                     | perfusion fixed | not reported               |
| Beckmann et al. (2018)      | MT       | MTR                 | 7     | 0.094 x 0.094 x 0.5 mm                                                                       | in vivo         | body temperature           |
| Bot et al. (2004)           | MT       | MTR                 | 4.7   | 0.007 x 0.007 x 1 mm                                                                         | fixed           | not reported               |
| Duhamel et al. (2019)       | MT       | ih-MTR              | 11.75 | 0.3125 x 0.3125 x 1 mm                                                                       | in vivo         | 37°C                       |
| Fatemi et al. (2011)        | MT       | MTR                 | 9.4   | 0.083 x 0.81 x 0.8 mm                                                                        | in vivo         | body temperature           |
| Fjer et al. (2013)          | MT       | MTR                 | 7     | 0.2 x 0.2 x 0.23 mm                                                                          | in vivo         | body temperature           |
| Fjer et al. (2015)          | MT       | MTR                 | 7     | 0.2 x 0.2 x 0.23 mm                                                                          | in vivo         | body temperature           |
| Gareau et al. (2000)        | MT       | MTR                 | 4     | 0.160 x 0.3 x 0.5 mm                                                                         | in vivo         | body temperature           |
| Hakkarainen et al. (2016)   | MT       | MTR                 | 9.4   | 0.0293 x 0.0293 x 0.7 mm                                                                     | perfusion fixed | not reported               |
| Janve et al. (2013)         | MT       | MP (PSR)            | 9.4   | 0.167 x 0.167 x 0.167 mm                                                                     | perfusion fixed | not reported               |
| Julescu et al. (2016)       | MT       | MTR                 | 7     | 0.112 x 0.112 x 0.8 mm                                                                       | in vivo         | body temperature           |
| Kelm et al. (2016)          | MT       | MP (PSR)            | 15.2  | 0.15 x 0.15 x 0.15 mm                                                                        | perfusion fixed | 17 ± 0.5 °C                |
| Khodanovich et al. (2017)   | MT       | MP ('MPF')          | 11.7  | 0.1 x 0.1 x 0.5 mm                                                                           | fixed           | body temperature           |
| Khodanovich et al. (2019)   | MT       | MP ('MPF')          | 11.7  | 0.1 x 0.1 x 0.5 mm                                                                           | fixed           | body temperature           |
| Lehto et al. (2017)         | MT       | T1sat, MTR          | 7     | 0.125 x 0.125 x 0.5 mm                                                                       | in vivo         | body temperature           |
| Moll et al. (2011)          | MT       | MTR                 | 1.5   | 0.9 x 0.9 x 3 mm                                                                             | in situ / fixed | body temperature           |
| Mottershead et al. (2003)   | MT       | MTR                 | 7     | Single 1.5 mm slices, in plane resolution between 0.055 and 0.068 mm                         | fresh           | 29-38°C                    |
| Odrobina et al. (2005)      | MT       | MTR, MP('M0b')      | 1.5   | not reported                                                                                 | fixed           | room temperature (20°C)    |
| Reeves et al. (2015)        | MT       | MTR                 | 9.4   | 0.136 x 0.136 x 0.500 mm                                                                     | fixed           | not reported               |
| Schmierer et al. (2010)     | MT       | MTR                 | 9.4   | not reported                                                                                 | fixed           | not reported               |
| Schmierer et al. (2004)     | MT       | MTR                 | 1.5   | 0.938 x 0.938 x 5 mm                                                                         | fresh           | mean 25.0°C (SD: 2.9°C)    |
| Schmierer et al. (2007a)    | MT       | MTR, MP('fb')       | 1.5   | 0.938 x 0.938 x 5 mm                                                                         | fresh           | room temperature           |
| Schmierer et al. (2008)     | MT       | MTR, MP('fb')       | 1.5   | 0.94 x 0.94 x 5 mm                                                                           | fresh / fixed   | room temperature           |
| Seewann et al. (2009)       | MT       | MTR                 | 1.5   | 1 x 1 x 5 mm                                                                                 | fixed           | 22.5°C                     |
| Soustelle et al. (2019)     | MT       | MP('f')             | 7     | 0.1 x 0.1 x 0.750 mm                                                                         | perfusion fixed | not reported               |
| Thiessen et al. (2013)      | MT       | MP('f'), MTR        | 7     | 0.098 x 0.098 x 0.750 mm                                                                     | perfusion fixed | room temperature (20°C)    |
|                             |          |                     |       |                                                                                              |                 | body temperature           |

Continued on next page

Table 2: **Information on MRI imaging of the assessed validation studies.** Provided are imaging modality, field strength in Tesla (T), imaging resolution in terms of voxel size, and the tissue state and temperature during scanning. **Acronyms: Imaging:** DWI: Diffusion-weighted imaging; AK: axial kurtosis; AI: Anisotropy Index (tADC/tADC); DBSI-RD: diffusion basis spectrum imaging - based radial diffusivity; DK: diffusion kurtosis metrics; DT: diffusion tensor metrics; FA: fractional anisotropy (from diffusion tensor model); IADC: longitudinal apparent diffusion coefficient (not modelled with tensor); MD: mean diffusivity (from diffusion tensor model); MK: mean kurtosis; RD: radial / transverse diffusivity (from diffusion tensor model); RK: radial kurtosis; SDI: diffusion standard deviation index; tADC: transverse apparent diffusion coefficient (not modelled with tensor); **Relaxometry:** MWF: myelin water fraction; R1: longitudinal relaxation rate; R2\*: effective transverse relaxation rate; **RAFF4:** Relaxation Along a Fictitious Field in the rotating frame of rank 4; T1: longitudinal relaxation time; T2: transverse relaxation time; T2\*: effective transverse relaxation time; **MT: magnetisation transfer:** BPF: bound pool fraction; F: pool size ratio; Fb: macromolecular proton fraction; **ih-MTR:** MTR from inhomogeneous MT; **M0b:** fraction of magnetization that resides in the semi-solid pool and undergoes MT exchange; **MP:** macromolecular pool; **MPPF:** macromolecular proton fraction; **MTR:** magnetisation transfer ratio; **PSR:** Macromolecular-to-free-water pool-size-ratio; **STE-MT:** MTR based on short echo time imaging; T1sat: T1 of saturated pool; **UTE-MTR:** MTR based on ultrashort echo time imaging; **QSM:** quantitative susceptibility mapping; **Others: rSPF:** relative semi-solid proton fraction from an 3D ultrashort echo time (UTE) sequence within an appropriate water suppression condition; **T1w/T2w:** ratio of image intensity in a T1-weighted vs T2-weighted acquisition.

| Reference                   | Modality    | Metrics           | T         | Resolution (mm)                                                                                   | Tissue state    | Temperature                     |
|-----------------------------|-------------|-------------------|-----------|---------------------------------------------------------------------------------------------------|-----------------|---------------------------------|
| Turati et al. (2015)        | MT          | MP(F')            | 7         | 0.1 x 0.1 x 0.6 mm                                                                                | in vivo         | body temperature                |
| Underhill et al. (2011)     | MT          | MP('BPF'),<br>MTR | 3         | 0.3 0.3 0.3 mm                                                                                    | in vivo         | body temperature                |
| van der Voorn et al. (2011) | MT          | MTR               | 1.5       | not reported (3 mm sections)                                                                      | fixed           | room temperature (20-22°C)      |
| West et al. (2018)          | MT          | MP (BPF')         | 15.2      | .150 x .150 x .150 mm                                                                             | perfusion fixed | not reported                    |
| Righart et al. (2017)       | Other       | T1w/T2w           | 1.5       | 1 x 1 x 1.5 mm                                                                                    | in situ         | not reported                    |
| Soustelle et al. (2019)     | Other       | rSPF              | 7         | 0.152 x 0.152 x 0.750 mm                                                                          | perfusion fixed | room temperature (20°C)         |
| Argyridis et al. (2014)     | QSM         | Susceptibility    | 9.4       | 0.06 mm isotropic                                                                                 | perfusion fixed | not reported                    |
| Hametner et al. (2018)      | QSM         | Susceptibility    | 7         | 0.43 x 0.43 x 0.65 mm                                                                             | in situ         | room temperature (20 deg)       |
| Lodygensky et al. (2012)    | QSM         | Susceptibility    | 9.4       | slice thickness of 0.5 mm, in-plane resolution between 0.0625 mm isotropic and 0.105 mm isotropic | in vivo         | body temperature                |
| Pol et al. (2019)           | QSM         | Susceptibility    | 9.4       | not reported                                                                                      | in vivo         | body temperature                |
| Soni et al. (2020)          | QSM         | Susceptibility    | 9.4       | 0.1 x 0.1 x 0.3 mm                                                                                | in vivo         | body temperature (36.537°C)     |
| Stüber et al. (2014)        | QSM         | Susceptibility    | 7         | 0.070 mm isotropic                                                                                | fixed           | not reported                    |
| Bagnato et al. (2018)       | Relaxometry | R2*               | 7         | 0.7 mm isotropic                                                                                  | fixed           | room temperature                |
| Bot et al. (2004)           | Relaxometry | T1, T2            | 4.7       | 0.007 x 0.007 x 1 mm                                                                              | fixed           | not reported                    |
| Chen et al. (2017)          | Relaxometry | MWF               | 7         | 0.07 x 0.07 x 05 mm                                                                               | perfusion fixed | not reported                    |
| Hakkarainen et al. (2016)   | Relaxometry | RAFFn, T1, T2     | 9.4       | 0.156 x 0.156 x .35 mm                                                                            | perfusion fixed | not reported                    |
| Hametner et al. (2018)      | Relaxometry | T1, R2*           | 7         | 0.43 x 0.43 x 0.65 mm                                                                             | in situ         | room temperature (20 deg)       |
| Jelescu et al. (2016)       | Relaxometry | T2                | 7         | 0.112 x 0.112 x 0.8 mm                                                                            | in vivo         | body temperature                |
| Kelm et al. (2016)          | Relaxometry | MWF               | 15.2      | 0.15 x 0.15 x 0.15 mm                                                                             | perfusion fixed | 17 ± 0.5 °C                     |
| Kozlowski et al. (2008)     | Relaxometry | MWF               | 7         | 0.078 x 0.078 x 1 mm                                                                              | perfusion fixed | not reported                    |
| Kozlowski et al. (2014)     | Relaxometry | MWF               | 7         | 0.117 x 0.117 x 1 mm (ex vivo) 1 x 1 x 1.5 mm (in vivo)                                           | perfusion fixed | body temperature / not reported |
| Laule et al. (2008)         | Relaxometry | MWF               | 7         | 0.234 x 0.234 x 1 mm                                                                              | fixed           | not reported                    |
| Laule et al. (2006)         | Relaxometry | MWF               | 1.5       | in plane resolution not reported, 3mm thick slices                                                | fixed           | 20°C                            |
| Laule et al. (2011)         | Relaxometry | MWF               | 1.5 and 7 | 0.586 x 0.586 x 3 mm (1.5T), 0.234 x 0.234 x 1mm (7T)                                             | fixed           | not reported                    |
| Lehto et al. (2017)         | Relaxometry | RAFF4             | 7         | 0.125 x 0.125 x 0.5 mm                                                                            | in vivo         | body temperature                |
| Mottershead et al. (2003)   | Relaxometry | PD, T1, T2        | 7         | Single 1.5 mm slices, in plane resolution between 0.055 and 0.068 mm                              | fresh           | 29-38°C                         |

Continued on next page

Table 2: **Information on MRI imaging of the assessed validation studies.** Provided are imaging modality, field strength in Tesla (T), imaging resolution in terms of voxel size, and the tissue state and temperature during scanning. **Acronyms: Imaging:** **AK:** axial kurtosis; **AI:** Anisotropy Index (tADC/tADC); **DBSI-RD:** diffusion basis spectrum imaging - based radial diffusivity; **DK:** diffusion kurtosis metrics; **DT:** diffusion tensor metrics; **FA:** fractional anisotropy (from diffusion tensor model); **IADC:** longitudinal apparent diffusion coefficient (not modelled with tensor); **MD:** mean diffusivity (from diffusion tensor model); **MK:** mean kurtosis; **RD:** radial / transverse diffusivity (from diffusion tensor model); **RK:** radial kurtosis; **SDI:** diffusion standard deviation index; **tADC:** transverse apparent diffusion coefficient (not modelled with tensor); **Relaxometry:** **MWF:** myelin water fraction; **R1:** longitudinal relaxation rate; **R2\*:** effective transverse relaxation rate; **RAFF4:** Relaxation Along a Fictitious Field in the rotating frame of rank 4; **T1:** longitudinal relaxation time; **T2:** transverse relaxation time; **T2\*:** effective transverse relaxation time; **MT: magnetisation transfer:** **BPF:** bound pool fraction; **F:** pool size ratio; **Fb:** macromolecular proton fraction; **ih-MTR:** MTR from inhomogeneous MT; **M0b:** fraction of magnetization that resides in the semi-solid pool and undergoes MT exchange; **MP:** macromolecular pool; **MPPF:** macromolecular proton fraction; **MTR:** magnetisation transfer ratio; **PSR:** Macromolecular-to-free-water pool-size-ratio; **STE-MT:** MTR based on short echo time imaging; **T1sat:** T1 of saturated pool; **UTE-MTR:** MTR based on ultrashort echo time imaging; **QSM:** quantitative susceptibility mapping; **Others:** **rSPF:** relative semi-solid proton fraction from an 3D ultrashort echo time (UTE) sequence within an appropriate water suppression condition; **T1w/T2w:** ratio of image intensity in a T1-weighted vs T2-weighted acquisition.

| Reference                | Modality    | Metrics     | T    | Resolution (mm)                                    | Tissue state    | Temperature             |
|--------------------------|-------------|-------------|------|----------------------------------------------------|-----------------|-------------------------|
| Oakden et al. (2015)     | Relaxometry | MWF         | 1.5  | 0.2 0.2 x 1 mm                                     | in vivo / fixed | body temperature        |
| Odobina et al. (2005)    | Relaxometry | MWF, T1, T2 | 1.5  | not reported                                       | fixed           | room temperature (20°C) |
| Pun et al. (2005)        | Relaxometry | T1, MWF     | 1.5  | not reported                                       | fresh           | 20 °C                   |
| Reeves et al. (2015)     | Relaxometry | T1, T2, T2* | 9.4  | 0.136 x 0.136 x 0.5 mm                             | fixed           | not reported            |
| Schmierer et al. (2010)  | Relaxometry | T1          | 9.4  | 0.117 x 0.156 x 1 mm                               | fixed           | not reported            |
| Schmierer et al. (2004)  | Relaxometry | T1          | 1.5  | 0.938 x 0.938 x 5 mm                               | fresh           | mean 25.0°C (SD: 2.9°C) |
| Schmierer et al. (2007a) | Relaxometry | T1          | 1.5  | 0.938 x 0.938 x 5 mm                               | fresh           | room temperature        |
| Schmierer et al. (2008)  | Relaxometry | T1, T2      | 1.5  | 0.94 x 0.94 x 5 mm                                 | fresh / fixed   | 22.5°C                  |
| Seewann et al. (2009)    | Relaxometry | T1          | 1.5  | 1 x 1 x 3 mm                                       | fixed           | not reported            |
| Soustelle et al. (2019)  | Relaxometry | MWF         | 7    | 0.1 x 0.1 x 0.750 mm                               | perfusion fixed | room temperature (20°C) |
| Stüber et al. (2014)     | Relaxometry | R1, R2*     | 7    | R1: 0.1 or 0.2 mm isotropic, R2*: 0.2 mm isotropic | fixed           | not reported            |
| Thiessen et al. (2013)   | Relaxometry | T1          | 7    | 0.098 0.098 0.750 mm                               | perfusion fixed | room temperature        |
| Wamjées et al. (2017)    | Relaxometry | MWF, R1     | 3    | 0.7 x 0.7 x 4 mm                                   | in situ         | mean: 7.8° (SD: 3.1°C)  |
| Webb et al. (2003)       | Relaxometry | MWF         | 1.5  | unclear                                            | fresh           | 20°C                    |
| West et al. (2018)       | Relaxometry | MWF         | 15.2 | .150 x .150 x .150 mm                              | perfusion fixed | not reported            |

Table 3: **Information on histology of the assessed validation studies.** Provided are information in tissue preparation, histological slice thickness, the histological method for myelin (and whether iron and axons were also considered) and the obtained histological metric. **Acronyms:** **AMG:** Autometallographic myelin stain; **LFB:** Luxol fast blue stain; **MA:** fraction of myelinated axons; **MAB238:** Anti-oligodendrocyte immunohistochemistry; **MBP:** Anti-myelin-basic-protein immunohistochemistry; **MSF:** myelin sheath fraction; **MST:** myelin sheath thickness; **MVF:** myelin volume fraction; **PAS:** periodic acid-Schiff; **PIXE:** proton-induced X-ray emission; **PLP:** Anti-proteolipid-protein immunohistochemistry.

| Reference               | Tissue preparation                 | Slice thickness | Myelin histology     | Iron | Axons | Histology Metric                           |
|-------------------------|------------------------------------|-----------------|----------------------|------|-------|--------------------------------------------|
| Abe et al. (2019)       | cryosectioning                     | 25 µm           | PLP                  | -    | +     | staining fraction                          |
| Aojula et al. (2016)    | perfusion fixation, cryosectioning | 15 µm           | MBP                  | -    | -     | staining fraction                          |
| Argyridis et al. (2014) | not reported                       | 2 µm            | LFB                  | +    | -     | contrasted and normalised luminance        |
| Bagnato et al. (2018)   | not reported                       | 10 µm           | LFB and PLP          | +    | -     | staining intensity                         |
| Beckmann et al. (2018)  | paraffin embedding                 | 3 µm            | LFB                  | -    | -     | staining intensity                         |
| Bot et al. (2004)       | not reported                       | 5 µm            | LFB                  | -    | +     | normalised staining intensity              |
| Chandran et al. (2012)  | paraffin embedding                 | 5 µm            | LFB, MBP             | -    | -     | staining intensity                         |
| Chang et al. (2017b)    | CLARITY                            | 3D              | MBP                  | -    | -     | staining intensity                         |
| Chang et al. (2017a)    | CLARITY                            | 3D              | MBP                  | -    | -     | normalised staining intensity              |
| Chen et al. (2017)      | ultra-sectioning                   | 1 µm            | EM                   | -    | +     | staining fraction                          |
| Choi et al. (2015)      | cryosectioning                     | 50 µm           | Gold chloride        | -    | +     | staining intensity                         |
| Duhamel et al. (2019)   | perfusion fixation, cryosectioning | 20 µm           | PLP-GFP fluorescence | -    | -     | normalised (background) staining intensity |

Continued on next page

**Table 3: Information on histology of the assessed validation studies.** Provided are information in tissue preparation, histological slice thickness, the histological method for myelin (and whether iron and axons were also considered) and the obtained histological metric. **Acronyms:** **AMG:** Autometallographic myelin stain; **LFB:** Luxol fast blue stain; **MA:** fraction of myelinated axons; **MAB238:** Anti-oligodendrocyte immunohistochemistry; **MBP:** Anti-myelin-basic-protein immunohistochemistry; **MSF:** myelin sheath fraction; **MST:** myelin sheath thickness; **MVF:** myelin volume fraction; **PAS:** periodic acid-Schiff; **PIXE:** proton-induced X-ray emission; **PLP:** Anti-proteolipid-protein immunohistochemistry.

| Reference                 | Tissue preparation                                      | Slice thickness                     | Myelin histology      | Iron | Axons | Histology Metric                                                                      |
|---------------------------|---------------------------------------------------------|-------------------------------------|-----------------------|------|-------|---------------------------------------------------------------------------------------|
| Fatemi et al. (2011)      | perfusion fixation, paraffin embedding / cryosectioning | 20 $\mu\text{m}$ / 40 $\mu\text{m}$ | LFB, MBP              | -    | +     | staining intensity                                                                    |
| Fjær et al. (2013)        | fixation, paraffin embedding                            | 7 $\mu\text{m}$                     | PLP                   | -    | -     | staining fraction                                                                     |
| Fjær et al. (2015)        | fixation, paraffin embedding                            | 7 $\mu\text{m}$                     | LFB, PLP              | +    | -     | manual scoring, staining fraction                                                     |
| Gareau et al. (2000)      | not reported                                            | 5 $\mu\text{m}$                     | Solochrome-R-cyanine  | -    | -     | score of estimated 'myelin pallor'                                                    |
| Grussu et al. (2017)      | paraffin embedding                                      | 10 $\mu\text{m}$                    | PLP                   | -    | +     | staining fraction                                                                     |
| Hakkarainen et al. (2016) | cryosectioning                                          | 30 $\mu\text{m}$                    | Gold chloride         | +    | -     | normalised staining intensity                                                         |
| Hametner et al. (2018)    | fixation, cutting, paraffin embedding                   | 10 $\mu\text{m}$                    | LFB                   | +    | -     | staining intensity                                                                    |
| Janve et al. (2013)       | paraffin embedding                                      | 10 $\mu\text{m}$                    | LFB                   | -    | -     | normalised staining intensity                                                         |
| Jelescu et al. (2016)     | perfusion fixation, nanosectioning                      | 2.36 nm                             | EM                    | -    | +     | staining fraction                                                                     |
| Jespersen et al. (2010)   | cryosectioning                                          | 40 $\mu\text{m}$                    | AMG                   | -    | +     | staining intensity                                                                    |
| Jito et al. (2008)        | perfusion fixation, semithin sectioning                 | 750 nm                              | Toluidine blue        | -    | +     | staining fraction                                                                     |
| Kelm et al. (2016)        | ultra-sectioning                                        | 70 nm                               | EM                    | -    | +     | staining fraction                                                                     |
| Khodanovich et al. (2017) | cryosectioning                                          | 10 $\mu\text{m}$                    | LFB                   | -    | -     | staining intensity                                                                    |
| Khodanovich et al. (2019) | cryosectioning                                          | 10 $\mu\text{m}$                    | MBP                   | -    | -     | staining fraction                                                                     |
| Kozłowski et al. (2008)   | cryosectioning                                          | 20 $\mu\text{m}$                    | LFB, MBP              | -    | +     | staining intensity (MBP), inverse staining intensity (LFB)                            |
| Kozłowski et al. (2014)   | cryosectioning                                          | 20 $\mu\text{m}$                    | MBP, EriochromeYanine | -    | +     | normalised staining intensity                                                         |
| Laule et al. (2008)       | paraffin embedding                                      | 10 $\mu\text{m}$                    | LFB                   | -    | -     | staining intensity                                                                    |
| Laule et al. (2006)       | paraffin embedding                                      | 10 $\mu\text{m}$                    | LFB                   | -    | -     | staining intensity                                                                    |
| Laule et al. (2011)       | paraffin embedding                                      | 10 $\mu\text{m}$                    | LFB, MBP              | -    | +     | normalised staining intensity                                                         |
| Lehto et al. (2017)       | cryosectioning                                          | 30 $\mu\text{m}$                    | Gold chloride         | -    | -     | staining intensity                                                                    |
| Lodygensky et al. (2012)  | perfusion fixation, cryosectioning                      | 50 $\mu\text{m}$                    | Black Gold II         | +    | -     | staining intensity                                                                    |
| Martirosyan et al. (2016) | paraffin embedding                                      | 15 $\mu\text{m}$                    | LFB                   | -    | -     | staining intensity, percentage difference between injury epicenter to control animals |
| Moll et al. (2011)        | cryosectioning                                          | 30 $\mu\text{m}$                    | MBP                   | -    | +     | staining intensity                                                                    |
| Mollink et al. (2019)     | paraffin embedding                                      | 6 $\mu\text{m}$                     | PLP                   | -    | +     | staining fraction                                                                     |
| Mottershead et al. (2003) | fixation, paraffin embedding                            | 10 $\mu\text{m}$                    | LFB                   | -    | +     | staining fraction                                                                     |
| Oakden et al. (2015)      | paraffin embedding                                      | 10 $\mu\text{m}$                    | LFB                   | -    | -     | visual classification of severity of pathology                                        |
| Odrobina et al. (2005)    | epon-araldite embedding                                 | 1 $\mu\text{m}$                     | Toluidine blue        | -    | -     | staining fraction                                                                     |
| Peters et al. (2019)      | fixation and sectioning                                 | 13 $\mu\text{m}$                    | LFB                   | -    | -     | staining intensity                                                                    |
| Pol et al. (2019)         | perfusion fixation and cryosectioning                   | 16 $\mu\text{m}$                    | Solochrome            | -    | -     | staining intensity                                                                    |
| Praet et al. (2018)       | fixation, paraffin embedding                            | 5 $\mu\text{m}$                     | MBP                   | -    | -     | staining intensity                                                                    |
| Pun et al. (2005)         | fixation, ultra-sectioning                              | 1 $\mu\text{m}$                     | Toluidine blue        | -    | +     | staining fraction                                                                     |
| Reeves et al. (2015)      | not reported                                            | 7 $\mu\text{m}$                     | MBP                   | -    | +     | staining intensity                                                                    |
| Righart et al. (2017)     | paraffin embedding                                      | 10 $\mu\text{m}$                    | PLP                   | -    | +     | staining intensity                                                                    |
| Schmierer et al. (2010)   | paraffin embedding                                      | 5 $\mu\text{m}$                     | MBP                   | -    | +     | inverse staining intensity                                                            |
| Schmierer et al. (2004)   | paraffin embedding                                      | not reported                        | LFB                   | -    | +     | inverse staining intensity                                                            |
| Schmierer et al. (2007a)  | fixation, paraffin embedding                            | not reported                        | LFB                   | -    | +     | inverse staining intensity                                                            |
| Schmierer et al. (2007b)  | fixation, paraffin embedding                            | 9.4±3.6 $\mu\text{m}$               | LFB                   | -    | +     | inverse staining intensity                                                            |
| Schmierer et al. (2008)   | paraffin embedding                                      | 5000 $\mu\text{m}$                  | LFB                   | -    | +     | inverse staining intensity                                                            |

Continued on next page



Table 3: **Information on histology of the assessed validation studies.** Provided are information in tissue preparation, histological slice thickness, the histological method for myelin (and whether iron and axons were also considered) and the obtained histological metric. **Acronyms:** **AMG:** Autometallographic myelin stain; **LFB:** Luxol fast blue stain; **MA:** fraction of myelinated axons; **MAB238:** Anti-oligodendrocyte immunohistochemistry; **MBP:** Anti-myelin-basic-protein immunohistochemistry; **MSF:** myelin sheath fraction; **MST:** myelin sheath thickness; **MVF:** myelin volume fraction; **PAS:** periodic acid-Schiff; **PIXE:** proton-induced X-ray emission; **PLP:** Anti-proteolipid-protein immunohistochemistry.

| Reference                   | Tissue preparation                     | Slice thickness     | Myelin histology   | Iron | Axons | Histology Metric                                 |
|-----------------------------|----------------------------------------|---------------------|--------------------|------|-------|--------------------------------------------------|
| Schwartz et al. (2005)      | epon immersion                         | 1 $\mu\text{m}$     | Toluidine blue     | -    | +     | staining fraction (MVF, MST)                     |
| Seehaus et al. (2015)       | cryosectioning                         | 60 $\mu\text{m}$    | Gallyas            | -    | -     | staining intensity                               |
| Seewam et al. (2009)        | paraffin embedding                     | 10 $\mu\text{m}$    | LFB; PAS; PLP      | -    | +     | inverse staining intensity                       |
| Soni et al. (2020)          | perfusion fixation, paraffin embedding | 10 $\mu\text{m}$    | MBP                | -    | -     | manual scoring of immunoreactivity               |
| Soustelle et al. (2019)     | sectioning                             | 60 $\mu\text{m}$    | MBP                | -    | -     | normalized staining intensity                    |
| Stüber et al. (2014)        | cryosectioning                         | 30 $\mu\text{m}$    | PIXE               | +    | -     | model-based estimation of myelin volume fraction |
| Sundberg et al. (2010)      | perfusion fixation, cryosectioning     | 35 $\mu\text{m}$    | MAB328             | -    | +     | staining fraction                                |
| Takagi et al. (2009)        | fixation and sectioning                | 80 nm               | EM                 | -    | +     | staining fraction                                |
| Thiessen et al. (2013)      | epon embedding                         | 1 $\mu\text{m}$     | EM                 | -    | +     | staining fraction (MA, MSF)                      |
| Tu et al. (2016)            | cryosections                           | 10 $\mu\text{m}$    | MBP                | -    | +     | normalised staining intensity                    |
| Turati et al. (2015)        | perfusion fixation, cryosectioning     | 10 $\mu\text{m}$    | Black Gold II, MBP | -    | -     | staining intensity                               |
| Underhill et al. (2011)     | perfusion fixation, paraffin embedding | 5 $\mu\text{m}$     | LFB                | -    | +     | normalized staining intensity                    |
| van der Voorn et al. (2011) | paraffin embedding                     | 7 $\mu\text{m}$     | LFB                | -    | +     | inverse staining intensity                       |
| van Tilborg et al. (2018)   | paraffin embedding                     | 8 $\mu\text{m}$     | MBP                | -    | -     | staining fraction                                |
| Wang et al. (2009)          | perfusion fixation, cryosectioning     | 10 $\mu\text{m}$    | LFB                | -    | +     | staining intensity                               |
| Wang et al. (2015)          | paraffin embedding                     | 5 $\mu\text{m}$     | LFB                | -    | +     | staining fraction                                |
| Warmtjes et al. (2017)      | fixation                               | 4 $\mu\text{m}$     | LFB                | -    | -     | staining intensity                               |
| Webb et al. (2003)          | fixation, crosssectioning              | 1 $\mu\text{m}$     | Toluidine blue     | -    | +     | staining fraction                                |
| Wei et al. (2013)           | cryosectioning                         | 50000 $\mu\text{m}$ | Gold chloride      | -    | -     | inverse staining intensity                       |
| West et al. (2018)          | ultraesectioning                       | 0.07 $\mu\text{m}$  | EM                 | -    | +     | staining fraction                                |
| Yano et al. (2018)          | cryosectioning                         | 25 $\mu\text{m}$    | PLP                | -    | -     | staining fraction                                |

Table 4: **Information on the employed statistical approach of the assessed validation studies.** Provided are information on the nature of data points that entered the correlation analysis, the method for coregistration between MRI and histology, sample size (number of subjects per group, total number of subjects, and number of data points for the analysis), the type of variance that was modelled in the statistical analysis, the reported statistic, and whether the study was selected for our meta-analysis (MA). **Acronyms:** **BS:** between-subject; **WS:** within-subject

| Reference            | Correlation | Coregistration    | N (Sub-jects/group)                                                                   | N (Total subjects) | N (ROIs)                      | Statistical Design   | Statistics | MA                     |
|----------------------|-------------|-------------------|---------------------------------------------------------------------------------------|--------------------|-------------------------------|----------------------|------------|------------------------|
| Abe et al. (2019)    | ROI to ROI  | No coregistration | 8                                                                                     | 8                  | 96 (in total across subjects) | Mixed (not modelled) | Pearson    | - (statistical design) |
| Aojula et al. (2016) | ROI to ROI  | No coregistration | 4 kaolin-only, 6 kaolin + PBS (control intervention), 5 kaolin + decorin, 4 controls, | 19                 | 2                             | Between-subject      | Spearman   | BS Pearson             |

Continued on next page

**Table 4: Information on the employed statistical approach of the assessed validation studies.** Provided are information on the nature of data points that entered the correlation analysis, the method for coregistration between MRI and histology, sample size (number of subjects per group, total number of subjects, and number of data points for the analysis), the type of variance that was modelled in the statistical analysis, the reported statistic, and whether the study was selected for our meta-analysis (MA). **Acronyms:** BS: between-subject; MA: meta-analysis; WS: within-subject

| Reference                 | Correlation                 | Coregistration                          | N (Sub-jects/group)                        | N (Total subjects) | N (ROIs)                                        | Statistical Design                        | Statistics                                                                | MA                      |
|---------------------------|-----------------------------|-----------------------------------------|--------------------------------------------|--------------------|-------------------------------------------------|-------------------------------------------|---------------------------------------------------------------------------|-------------------------|
| Argyridis et al. (2014)   | ROI to ROI                  | Not reported                            | 18                                         | 18                 | 3 (pooled into 1 weighted measure)              | Between-subject                           | Not reported (likely linear regression)                                   | BS Pearson              |
| Bagnato et al. (2018)     | ROI to ROI                  | No coregistration                       | 7                                          | 7                  | 429 (in total across subjects)                  | Within-subject (mixed, modelled)          | Pearson; linear regression                                                | WS Pearson              |
| Beckmann et al. (2018)    | ROI to ROI                  | Not reported                            | 5                                          | 20                 | 1                                               | Between-subject                           | Pearson                                                                   | BS Pearson              |
| Bot et al. (2004)         | ROI to ROI                  | No coregistration                       | 11 MS, 2 controls                          | 13                 | 222 (in total across subjects)                  | Mixed (unclear)                           | Spearman; linear regression                                               | - (statistical de-sign) |
| Chandran et al. (2012)    | ROI to ROI                  | Not reported                            | 5 to 6 per group                           | 20                 | 1                                               | Between-subject                           | Linear regression                                                         | BS Pearson              |
| Chang et al. (2017b)      | ROI to ROI                  | Linear registration (12 dof affine)     | 4                                          | 4                  | 14 (in total across subjects)                   | Mixed (not modelled)                      | Spearman; linear regression                                               | - (statistical de-sign) |
| Chang et al. (2017a)      | ROI to ROI                  | Unclear                                 | 4                                          | 4                  | 14 (in total across subjects)                   | Mixed (not modelled)                      | Spearman                                                                  | - (statistical de-sign) |
| Chen et al. (2017)        | ROI to ROI                  | NA                                      | 3 to 6 per group                           | 14                 | 1                                               | Between-subject                           | not reported                                                              | - (statistical measure) |
| Choi et al. (2015)        | ROI to ROI                  | Linear registration (affine, in Matlab) | 2 MPS brains, 1 control                    | 3                  | 16                                              | Within-subject                            | Correlation coefficient type not reported; Multivariate linear regression | - (statistical measure) |
| Duhamel et al. (2019)     | ROI to ROI                  | No coregistration                       | 3                                          | 3                  | 8 (7 ROIs + 1 "ROI" of relative GM/WM contrast) | Mixed (not modelled)                      | Pearson; linear regression                                                | - (statistical de-sign) |
| Fatemi et al. (2011)      | ROI to ROI                  | Not reported                            | 29 ischemic injury, 33 controls            | 61                 | 25 (in total across subjects)                   | Unclear (likely mixed, not modelled)      | Linear regression                                                         | - (statistical de-sign) |
| Fjær et al. (2013)        | ROI to ROI                  | No coregistration                       | 6 controls, 48 cuprizone at varying stages | 54                 | 4                                               | Between-subject                           | Linear regression                                                         | BS Pearson              |
| Fjær et al. (2015)        | ROI to ROI                  | Not reported                            | 6                                          | 24                 | 5                                               | Between-subject                           | Linear regression                                                         | BS Pearson              |
| Gareau et al. (2000)      | unclear (likely ROI to ROI) | No coregistration                       | 6x4 at different time points, 6 controls   | 24                 | 1                                               | Between-subject                           | Spearman                                                                  | BS Spearman             |
| Grussu et al. (2017)      | ROI to ROI                  | Landmark-based non-linear registration  | 2 MS, 2 controls                           | 4                  | 48 (in total across subjects)                   | Mixed (not modelled)                      | Pearson; linear regression                                                | - (statistical de-sign) |
| Hakkarainen et al. (2016) | ROI to ROI                  | Not reported                            | 5 to 6 per group                           | 5                  | 60 (in total across subjects)                   | Not reported (likely mixed, not modelled) | Pearson                                                                   | - (statistical de-sign) |

Continued on next page



**Table 4: Information on the employed statistical approach of the assessed validation studies.** Provided are information on the nature of data points that entered the correlation analysis, the method for coregistration between MRI and histology, sample size (number of subjects per group, total number of subjects, and number of data points for the analysis), the type of variance that was modelled in the statistical analysis, the reported statistic, and whether the study was selected for our meta-analysis (MA). **Acronyms:** BS: between-subject; WS: within-subject

| Reference                                 | Correlation | Coregistration                     | N (Sub-jects/group)                                                                               | N (Total subjects)              | N (ROIs)                                                                        | Statistical Design               | Statistics                              | MA                     |
|-------------------------------------------|-------------|------------------------------------|---------------------------------------------------------------------------------------------------|---------------------------------|---------------------------------------------------------------------------------|----------------------------------|-----------------------------------------|------------------------|
| <a href="#">Hametner et al. (2018)</a>    | ROI to ROI  | No coregistration                  | 6                                                                                                 | 6                               | 2870 (in total across subjects) for R2*, 2809 (in total across subjects) for T1 | Within-subject (mixed, modelled) | Linear regression                       | WS Pearson             |
| <a href="#">Janve et al. (2013)</a>       | ROI to ROI  | Manual coregistration              | 8 LPS, 1 control                                                                                  | 9                               | 6                                                                               | Mixed (not modelled)             | Pearson                                 | - (statistical design) |
| <a href="#">Jelescu et al. (2016)</a>     | ROI to ROI  | NA                                 | 2 x 12 Cuprizone, 10 controls                                                                     | 34                              | 1                                                                               | Between-subject                  | Partial Spearman (weight as covariate)  | BS Spearman            |
| <a href="#">Jespersen et al. (2010)</a>   | ROI to ROI  | No coregistration                  | 3                                                                                                 | 3                               | 8                                                                               | Mixed (not modelled)             | Pearson                                 | - (statistical design) |
| <a href="#">Jito et al. (2008)</a>        | ROI to ROI  | NA                                 | 6                                                                                                 | 36                              | 1                                                                               | Between-subject                  | Linear regression                       | BS Pearson             |
| <a href="#">Kelm et al. (2016)</a>        | ROI to ROI  | No coregistration                  | 4 TSC, 3 Rictor, 5 Controls                                                                       | 12                              | 6                                                                               | Mixed (not modelled)             | not reported                            | - (statistical design) |
| <a href="#">Khodamovich et al. (2017)</a> | ROI to ROI  | No coregistration                  | 7 cuprizone, 7 controls                                                                           | 14                              | 6                                                                               | Within-subject (mixed, modelled) | Pearson; linear regression              | WS Pearson             |
| <a href="#">Khodamovich et al. (2019)</a> | ROI to ROI  | No coregistration                  | 4 demyelination, 5 remyelination, 4 controls                                                      | 13                              | 1                                                                               | Between-subject                  | Pearson; linear regression              | BS Pearson             |
| <a href="#">Kozlowski et al. (2008)</a>   | ROI to ROI  | No coregistration                  | 6 at 3 weeks post injury, 4 at 8 weeks post injury, 6 controls (controls not used in correlation) | 6 and 4 pending on the analysis | 3                                                                               | Mixed (not modelled)             | Pearson                                 | - (statistical design) |
| <a href="#">Kozlowski et al. (2014)</a>   | ROI to ROI  | No coregistration                  | 8                                                                                                 | 16                              | 1                                                                               | Between-subject                  | Pearson                                 | - (no result)          |
| <a href="#">Laule et al. (2008)</a>       | ROI to ROI  | Landmark-based linear registration | 3 MS patients, 10 samples                                                                         | 3                               | 22-30 per sample                                                                | Within-subject                   | Not reported (likely linear regression) | - (N = 3)              |
| <a href="#">Laule et al. (2006)</a>       | ROI to ROI  | Landmark-based linear registration | 13                                                                                                | 13                              | 23-45 per slice                                                                 | Within-subject                   | Not reported (likely linear regression) | WS Pearson             |
| <a href="#">Laule et al. (2011)</a>       | ROI to ROI  | Landmark-based linear registration | 9 MS patients, 23 samples                                                                         | 9                               | Not reported                                                                    | Within-subject                   | Not reported (likely linear regression) | WS Pearson             |

Continued on next page

**Table 4: Information on the employed statistical approach of the assessed validation studies.** Provided are information on the nature of data points that entered the correlation analysis, the method for coregistration between MRI and histology, sample size (number of subjects per group, total number of subjects, and number of data points for the analysis), the type of variance that was modelled in the statistical analysis, the reported statistic, and whether the study was selected for our meta-analysis (MA). **Acronyms:** BS: between-subject; MA: meta-analysis (MA); Acronyms: BS: between-subject; WS: within-subject

| Reference                                 | Correlation                 | Coregistration                                    | N (Sub-jects/group)                        | N (Total subjects) | N (ROIs)                                                 | Statistical Design                   | Statistics                                                                                       | MA                      |
|-------------------------------------------|-----------------------------|---------------------------------------------------|--------------------------------------------|--------------------|----------------------------------------------------------|--------------------------------------|--------------------------------------------------------------------------------------------------|-------------------------|
| <a href="#">Lehto et al. (2017)</a>       | ROI to ROI                  | No coregistration                                 | 21                                         | 21                 | 12 and 2 depending on the analysis                       | Mixed (not modelled)                 | Pearson                                                                                          | - (statistical design)  |
| <a href="#">Lodygensky et al. (2012)</a>  | ROI to ROI                  | Not reported                                      | 13 (across different ages)                 | 13                 | 2                                                        | Between-subject                      | Linear regression; Spearman mentioned but not reported                                           | BS Pearson              |
| <a href="#">Martirosyan et al. (2016)</a> | ROI to ROI                  | No coregistration                                 | 15 from different types of SCI, 3 controls | 18                 | 1                                                        | Between-subject                      | Pearson                                                                                          | BS Pearson              |
| <a href="#">Moll et al. (2011)</a>        | ROI to ROI                  | No coregistration                                 | 4                                          | 4                  | 12 (in total across subjects)                            | Mixed (not modelled)                 | Spearman                                                                                         | - (statistical design)  |
| <a href="#">Mollink et al. (2019)</a>     | ROI to ROI                  | No coregistration                                 | 14 ALS and 5 Controls                      | 19                 | 1                                                        | Between-subject                      | Pearson                                                                                          | BS Pearson              |
| <a href="#">Mottershead et al. (2003)</a> | ROI to ROI                  | No coregistration                                 | 4 MS patients, 1 control                   | 5                  | 108 (in total across subjects)                           | Mixed (not modelled)                 | Spearman                                                                                         | - (statistical design)  |
| <a href="#">Oakden et al. (2015)</a>      | ROI to ROI                  | Manual coregistration                             | 8 for acute group, 8 for chronic group     | 16                 | Variable and only specified for significant correlations | Mixed (not modelled)                 | Pearson                                                                                          | - (statistical design)  |
| <a href="#">Odrobina et al. (2005)</a>    | unclear (likely ROI to ROI) | No coregistration                                 | Not reported                               | Not reported       | Not reported (likely 2)                                  | Unclear (likely mixed, not modelled) | Not reported                                                                                     | - (statistical design)  |
| <a href="#">Peters et al. (2019)</a>      | voxel-wise                  | 3D registration                                   | 3                                          | 3 (1 reported)     | not reported                                             | Within-subject                       | Spearman                                                                                         | - (N = 1)               |
| <a href="#">Pol et al. (2019)</a>         | ROI to ROI                  | No coregistration                                 | 13 Telflumide, 12 controls                 | 25                 | 3                                                        | Between-subject                      | Pearson                                                                                          | BS Pearson              |
| <a href="#">Praet et al. (2018)</a>       | ROI to ROI and voxelwise    | 3D stacking of histology, non-linear registration | 48 Alzheimer's model, 32 wild type         | 80                 | 1                                                        | Between-subject                      | Pearson (Bonferroni corrected for multiple comparisons); Bayesian multivariate linear regression | BS Pearson              |
| <a href="#">Pun et al. (2005)</a>         | unclear                     | Unclear                                           | 62 Telflumium, 34 controls                 | 96                 | 1                                                        | Between-subject                      | not reported                                                                                     | - (statistical measure) |
| <a href="#">Reeves et al. (2015)</a>      | ROI to ROI                  | Manual coregistration                             | 12 epilepsy, 1 control                     | 13                 | 3-4 (43 in total across subjects)                        | Mixed (not modelled)                 | Spearman; linear regression                                                                      | - (statistical design)  |

Continued on next page

**Table 4: Information on the employed statistical approach of the assessed validation studies.** Provided are information on the nature of data points that entered the correlation analysis, the method for coregistration between MRI and histology, sample size (number of subjects per group, total number of subjects, and number of data points for the analysis), the type of variance that was modelled in the statistical analysis, the reported statistic, and whether the study was selected for our meta-analysis (MA). **Acronyms:** BS: between-subject; MA: meta-analysis; MA: between-subject; WS: within-subject

| Reference                                | Correlation      | Coregistration              | N (Sub-jects/group)                                   | N (Total subjects)              | N (ROIs)                                   | Statistical Design                                                                        | Statistics                                           | MA                      |
|------------------------------------------|------------------|-----------------------------|-------------------------------------------------------|---------------------------------|--------------------------------------------|-------------------------------------------------------------------------------------------|------------------------------------------------------|-------------------------|
| <a href="#">Righart et al. (2017)</a>    | ROI to ROI       | No coregistration           | 9                                                     | 9                               | 5 per patient; 36 in total across subjects | Mixed (not modelled)                                                                      | Generalized estimating equations                     | - (statistical de-sign) |
| <a href="#">Schmierer et al. (2010)</a>  | ROI to ROI       | Manual coregistration       | 21                                                    | 2                               | 2                                          | Mixed (not modelled)                                                                      | Linear regression                                    | - (statistical de-sign) |
| <a href="#">Schmierer et al. (2004)</a>  | ROI to ROI       | Manual coregistration       | 19                                                    | 20                              | 68 (in total across subjects)              | Within-subject (mixed, modelled)                                                          | Pearson                                              | WS Pearson              |
| <a href="#">Schmierer et al. (2007a)</a> | ROI to ROI       | Manual coregistration       | 35                                                    | 35                              | 129 (in total across subjects)             | Within-subject (mixed, modelled)                                                          | Pearson                                              | WS Pearson              |
| <a href="#">Schmierer et al. (2007b)</a> | ROI to ROI       | No coregistration           | 16                                                    | 16                              | 44-51 depending on the analysis            | Within-subject (mixed, modelled)                                                          | Pearson                                              | WS Pearson              |
| <a href="#">Schmierer et al. (2008)</a>  | ROI to ROI       | No coregistration           | 15                                                    | 15                              | 40-44 (in total across subjects)           | Mixed (unclear whether modelled)                                                          | Linear regression                                    | - (statistical de-sign) |
| <a href="#">Schwartz et al. (2005)</a>   | ROI to ROI       | No coregistration           | 3                                                     | 3                               | 6                                          | Mixed (unclear whether modelled)                                                          | Pearson; linear regression                           | - (statistical de-sign) |
| <a href="#">Seehaus et al. (2015)</a>    | voxel-wise       | 3D affine                   | 1                                                     | 1                               | voxel-wise (62782)                         | Within-subject                                                                            | Pearson                                              | - (N = 1)               |
| <a href="#">Seewann et al. (2009)</a>    | ROI to ROI       | Manual coregistration       | 10                                                    | 10                              | 42 (in total across subjects)              | Mixed (modelled, but unclear whether result refers to within or between subject variance) | Pearson; Spearman mentioned but not reported         | - (statistical de-sign) |
| <a href="#">Soni et al. (2020)</a>       | ROI to ROI       | No coregistration           | 36 TBI, 6 controls; correlation only for TBI group    | 36                              | 3                                          | Between-subject                                                                           | Spearman                                             | BS Spearman             |
| <a href="#">Soustelle et al. (2019)</a>  | ROI to ROI       | No coregistration           | 7 cuprizone-fed, 8 controls                           | 15                              | 3 (1/animal in each correlation)           | Between-subject                                                                           | Spearman                                             | BS Spearman             |
| <a href="#">Stüber et al. (2014)</a>     | pixel-wise       | Landmark-based registration | 3                                                     | 3                               | pixel-wise                                 | Within-subject                                                                            | Pearson; linear regression (univariate and multiple) | - (N = 3)               |
| <a href="#">Sundberg et al. (2010)</a>   | ROI to ROI       | No coregistration           | 15 injury, 9 control (two groups analysed separately) | 15, 9 depending on the analysis | 3                                          | Mixed (not modelled)                                                                      | Pearson                                              | - (statistical de-sign) |
| <a href="#">Takagi et al. (2009)</a>     | sample to sample | NA                          | 10                                                    | 70                              | 1                                          | Unclear                                                                                   | Pearson                                              | - (statistical de-sign) |

Continued on next page

**Table 4: Information on the employed statistical approach of the assessed validation studies.** Provided are information on the nature of data points that entered the correlation analysis, the method for coregistration between MRI and histology, sample size (number of subjects per group, total number of subjects, and number of data points for the analysis), the type of variance that was modelled in the statistical analysis, the reported statistic, and whether the study was selected for our meta-analysis (MA). **Acronyms:** BS: between-subject; MA: meta-analysis (MA). **Acronyms:** BS: between-subject; WS: within-subject

| Reference                   | Correlation | Coregistration                                                           | N (Sub-jects/group)              | N (Total subjects)   | N (ROIs)                                                 | Statistical Design                                                                                                   | Statistics                          | MA                      |
|-----------------------------|-------------|--------------------------------------------------------------------------|----------------------------------|----------------------|----------------------------------------------------------|----------------------------------------------------------------------------------------------------------------------|-------------------------------------|-------------------------|
| Thiessen et al. (2013)      | ROI to ROI  | No coregistration                                                        | 5 cuprizone, 5 controls          | 10                   | 1                                                        | Between-subject (both within groups and pooled across groups) and within-group results have n = 5 rather than n = 10 | Spearman                            | BS Spearman             |
| Tu et al. (2016)            | ROI to ROI  | No coregistration                                                        | 5                                | 25                   | 7                                                        | Unclear (likely mixed, not modelled)                                                                                 | Pearson                             | - (statistical de-sign) |
| Turati et al. (2015)        | ROI to ROI  | No coregistration                                                        | 15 per mouse strain              | 15 for each analysis | 1                                                        | Between-subject (pooled across groups)                                                                               | Spearman                            | BS Spearman             |
| Underhill et al. (2011)     | ROI to ROI  | No coregistration                                                        | 5 and 4                          | 9                    | 1                                                        | Within-subject (mixed, modelled)                                                                                     | Pearson                             | WS Pearson              |
| van der Voorn et al. (2011) | ROI to ROI  | Manual coregistration                                                    | 15 patients, 5 controls          | 20                   | 55 (in total across subjects)                            | Mixed (not modelled)                                                                                                 | Pearson, linear regression analysis | - (statistical de-sign) |
| van Tilborg et al. (2018)   | unclear     | Unclear                                                                  | 6                                | 12                   | 3                                                        | Between-subject                                                                                                      | Linear regression                   | BS Pearson              |
| Wang et al. (2009)          | ROI to ROI  | No coregistration                                                        | 15 at different ages             | 15                   | Unclear (likely 2)                                       | Unclear (likely mixed, not modelled)                                                                                 | Pearson                             | - (statistical de-sign) |
| Wang et al. (2015)          | voxel-wise  | Landmark-based linear coregistration (rigid body, based on 13 landmarks) | 3                                | 3                    | 80 voxels (subset of total voxels selected for analysis) | Within-subject                                                                                                       | Spearman                            | - (N = 3)               |
| Warmijes et al. (2017)      | pixel-wise  | Manual coregistration by rotation, translation, and scaling              | 12                               | 12                   | 2                                                        | Within-subject (mixed, modelled)                                                                                     | Spearman; linear regression         | WS Spearman             |
| Webb et al. (2003)          | ROI to ROI  | Manual coregistration                                                    | 6                                | 18                   | 2                                                        | Mixed (not modelled)                                                                                                 | Linear regression                   | - (statistical de-sign) |
| Wei et al. (2013)           | ROI to ROI  | 3D stacking of histological images and linear coregistration             | 1                                | 1                    | 20                                                       | Within-subject                                                                                                       | Pearson; linear regression          | - (N = 1)               |
| West et al. (2018)          | unclear     | NA                                                                       | 3 per group, 6 controls          | 15                   | unclear (likely 4)                                       | Mixed (not modelled)                                                                                                 | Linear regression                   | - (statistical de-sign) |
| Yano et al. (2018)          | ROI to ROI  | No coregistration                                                        | 18 cuprizone treated, 3 controls | 21                   | 1                                                        | Between-subject                                                                                                      | Pearson                             | BS Pearson              |

**Table 5: Information on the statistical results of the assessed validation studies.**

| Reference            | Modality | Result                                                                                                                                                                                                                                                                      | Linear equation |
|----------------------|----------|-----------------------------------------------------------------------------------------------------------------------------------------------------------------------------------------------------------------------------------------------------------------------------|-----------------|
| Abe et al. (2019)    | DWI      | FA: $r = .32$ ( $p = .012$ ), RD: $r = -.41$ ( $p = .001$ ), AD: $r = -.11$ ( $p = .39$ )                                                                                                                                                                                   | NA              |
| Aojula et al. (2016) | DWI      | AD: $r = .159$ , $p = .541$ (CC); $r = -.360$ , $p = 0.155$ (PVWM); FA: $r = .091$ , $p = .729$ (CC); $r = .346$ , $p = .174$ (PVWM); MD: $r = -.031$ , $p = .903$ (CC); $r = -.495$ , $p = .043$ (PVWM); RD: $r = -.115$ , $p = .66$ (CC); $r = -.458$ , $p = .064$ (PVWM) | NA              |

Continued on next page

Table 5: Information on the statistical results of the assessed validation studies.

| Reference                 | Modality | Result                                                                                                                                                                                                                                                                                                                                                                                                                                                                                                                                                                                                                                                                                                                                                                                                                                                                            | Linear equation            |
|---------------------------|----------|-----------------------------------------------------------------------------------------------------------------------------------------------------------------------------------------------------------------------------------------------------------------------------------------------------------------------------------------------------------------------------------------------------------------------------------------------------------------------------------------------------------------------------------------------------------------------------------------------------------------------------------------------------------------------------------------------------------------------------------------------------------------------------------------------------------------------------------------------------------------------------------|----------------------------|
| Argyridis et al. (2014)   | DWI      | MD: R2 = .003, p = .46                                                                                                                                                                                                                                                                                                                                                                                                                                                                                                                                                                                                                                                                                                                                                                                                                                                            | MD = -0.09 * myelin + 0.69 |
| Chandran et al. (2012)    | DWI      | FA: R2 = .27, p = .016 (LFB), R2 = .50, p = .0003 (MBP); RD: R2 = .34, p = .005 (MBP), R2 = 0.05; p = .31 (LFB)                                                                                                                                                                                                                                                                                                                                                                                                                                                                                                                                                                                                                                                                                                                                                                   | not reported               |
| Chang et al. (2017b)      | DWI      | AD: p = .61; FA: p < .01; RD: p = .83                                                                                                                                                                                                                                                                                                                                                                                                                                                                                                                                                                                                                                                                                                                                                                                                                                             | Not reported               |
| Chang et al. (2017a)      | DWI      | AD: r = .0385; FA: r = .446, p < .05; MD: r = -.114; RD: r = -.195                                                                                                                                                                                                                                                                                                                                                                                                                                                                                                                                                                                                                                                                                                                                                                                                                | NA                         |
| Choi et al. (2015)        | DWI      | FA: p = 1.9 10 <sup>-5</sup> (control), p = .989 and p = .776 (MPS); RD: p < .0001 (control), p = .917 and p = .459 (MPS)                                                                                                                                                                                                                                                                                                                                                                                                                                                                                                                                                                                                                                                                                                                                                         | Not reported               |
| Grussu et al. (2017)      | DWI      | AD: r = .75, p < .001; FA: r = .42, p = .025; MD: r = .67; p < .001; RD: r = .61; p < .001                                                                                                                                                                                                                                                                                                                                                                                                                                                                                                                                                                                                                                                                                                                                                                                        | See paper                  |
| Janve et al. (2013)       | DWI      | AD: r = .03 (lesion), r = -.08 (combined); FA: r = .16 (lesion), r = .27 (combined); RD: r = -.40 (lesion), r = -.49 (combined)                                                                                                                                                                                                                                                                                                                                                                                                                                                                                                                                                                                                                                                                                                                                                   | NA                         |
| Jelescu et al. (2016)     | DWI      | RD: r = -.71, p = .0004; RK: r = .14, p = .5638                                                                                                                                                                                                                                                                                                                                                                                                                                                                                                                                                                                                                                                                                                                                                                                                                                   | NA                         |
| Jespersen et al. (2010)   | DWI      | FA: r = .78, p = 7 10 <sup>-8</sup>                                                                                                                                                                                                                                                                                                                                                                                                                                                                                                                                                                                                                                                                                                                                                                                                                                               | NA                         |
| Jito et al. (2008)        | DWI      | FA: r = .856, p < .0001                                                                                                                                                                                                                                                                                                                                                                                                                                                                                                                                                                                                                                                                                                                                                                                                                                                           | not reported               |
| Kelm et al. (2016)        | DWI      | FA: not significant; MD: R2 = .35; RD: R2 = .37; MK: R2 = .48; AK: not significant; RK: r = .49                                                                                                                                                                                                                                                                                                                                                                                                                                                                                                                                                                                                                                                                                                                                                                                   | NA                         |
| Kozlowski et al. (2008)   | DWI      | AD: r = -.27, p = .07 for LFB at 3 weeks, r = .24 (p = .16) for LFB at 8 weeks, r = -.35 (p = .02) for MBP at 3 weeks, r = .03 (p = .88) for MBP at 8 weeks; FA: r = .33 (p = .02) for LFB at 3 weeks, r = .72 (p < .001) for LFB at 8 weeks, r = -.66 (p < .0001) for MBP at 3 weeks, r = .22 (p = .19) for MBP at 8 weeks; MD: r = -.60 (p < .001) for LFB at 3 weeks, r = -.57 (p < .001) for LFB at 8 weeks, r = .26 (p = .08) for MBP at 3 weeks, r = -.19 (p = .26) for MBP at 8 weeks; RD: r = -.49 (p < .001) for LFB at 3 weeks, r = -.71 (p < .001) for LFB at 8 weeks, r = .51 (p < .001) for MBP at 3 weeks, r = -.21 (p = .22) for MBP at 8 weeks                                                                                                                                                                                                                    | NA                         |
| Kozlowski et al. (2014)   | DWI      | not reported                                                                                                                                                                                                                                                                                                                                                                                                                                                                                                                                                                                                                                                                                                                                                                                                                                                                      | NA                         |
| Lehto et al. (2017)       | DWI      | AD: r = .714, p < .001 (CC), r = .279, p = .223 (DTT); FA: r = .662, p < .001 (C), r = .438, p = .053 (DTT); MD: r = .708, p < .001 (CC), r = .112, p = .610 (DTT); RD: r = .257, p = .048 (CC), r = -.079, p = .739 (DTT)                                                                                                                                                                                                                                                                                                                                                                                                                                                                                                                                                                                                                                                        | NA                         |
| Martirosyan et al. (2016) | DWI      | FA: r = -.94 (p = .0001)                                                                                                                                                                                                                                                                                                                                                                                                                                                                                                                                                                                                                                                                                                                                                                                                                                                          | NA                         |
| Moll et al. (2011)        | DWI      | AD: r = -.41 (p = .004); FA: r = .38 (p = .008); MD: r = -.58 (p < .0001), RD: r = -.52 (p = .0002)                                                                                                                                                                                                                                                                                                                                                                                                                                                                                                                                                                                                                                                                                                                                                                               | NA                         |
| Mollink et al. (2019)     | DWI      | FA: r = .52, p = .03                                                                                                                                                                                                                                                                                                                                                                                                                                                                                                                                                                                                                                                                                                                                                                                                                                                              | NA                         |
| Motterhead et al. (2003)  | DWI      | ADC: r = -.45 (p = .001); SDI: r = .51 (p < .001)                                                                                                                                                                                                                                                                                                                                                                                                                                                                                                                                                                                                                                                                                                                                                                                                                                 | NA                         |
| Oakden et al. (2015)      | DWI      | AD: r = .39; RD: r = .57                                                                                                                                                                                                                                                                                                                                                                                                                                                                                                                                                                                                                                                                                                                                                                                                                                                          | NA                         |
| Peters et al. (2019)      | DWI      | FA: r = .10 (CT), r = .09 (Tuber), r = .45 (Perituber), r = .19 (WM), r = .70 (All); MD: r = .04 (CT), r = .07 (Tuber), r = -.63 (Perituber), r = -.60 (WM), r = -.85 (All)                                                                                                                                                                                                                                                                                                                                                                                                                                                                                                                                                                                                                                                                                                       | NA                         |
| Pol et al. (2019)         | DWI      | FA: r = -.240, p = .675 (caudal medial, controls), r = -.130, p = .802 (rostral lateral, controls), r = -.147, p = .785 (rostral medial, controls), r = -.122, p = .825 (caudal medial, Teliflumomide), r = -.265, p = .643 (rostral lateral, Teliflumomide), r = .017, p = .981 (rostral medial, Teliflumomide); MD: r = .592, p = .202 (caudal medial, controls), r = .377, p = .438 (rostral lateral, controls), r = .221, p = .675 (rostral medial, controls), r = -.083, p = .896 (caudal medial, Teliflumomide), r = -.237, p = .667 (rostral lateral, Teliflumomide), r = .069, p = .903 (rostral medial, Teliflumomide); AD: r = -.479, p = .0362; AK: r = .376 (p = .4851); FA: r = -.560 (p = .0025); MD: r = -.175, p = .1; MK: r = .504 (p = .0173); RD: r = .272, p = .1; RK: r = .518 (p = .0110); Voxelwise statistics: DT: r = .5545, DK: r = .4509, DT/DK: .6374 | Not reported               |
| Praet et al. (2018)       | DWI      | FA: r = -.79, p < .001; MD: r = .68, p < .001                                                                                                                                                                                                                                                                                                                                                                                                                                                                                                                                                                                                                                                                                                                                                                                                                                     | NA                         |
| Schmierer et al. (2007b)  | DWI      | AD: r = .53 (unfixed) and r = .8 (fixed); FA: r = -.78 (unfixed) and r = -.83 (fixed); MD: r = .73 (unfixed) and r = .78 (fixed); RD: r = .74 (unfixed) and .81 (fixed), all p < .01                                                                                                                                                                                                                                                                                                                                                                                                                                                                                                                                                                                                                                                                                              | Not reported               |
| Schmierer et al. (2008)   | DWI      |                                                                                                                                                                                                                                                                                                                                                                                                                                                                                                                                                                                                                                                                                                                                                                                                                                                                                   |                            |

Continued on next page

Table 5: Information on the statistical results of the assessed validation studies.

| Reference                   | Modality | Result                                                                                                                                                                                                                                                                                                       | Linear equation                                                                                                                                                                                |
|-----------------------------|----------|--------------------------------------------------------------------------------------------------------------------------------------------------------------------------------------------------------------------------------------------------------------------------------------------------------------|------------------------------------------------------------------------------------------------------------------------------------------------------------------------------------------------|
| Schwartz et al. (2005)      | DWI      | AI: $r = -.58$ , $p = .0125$ (MVF), $r = 0.19$ , $p = 0.4536$ (MST); IADC: $r = -.48$ , $p = .0437$ (MVF), $r = .43$ , $p = .0717$ (MST); tADC: $r = -.74$ , $p = .0004$ (MVF), $r = .34$ , $p = .1701$ (MST)                                                                                                | Not reported                                                                                                                                                                                   |
| Seehaus et al. (2015)       | DWI      | FA: $r = .487$ , MD: $r = -.542$ , RD: $r = -.554$                                                                                                                                                                                                                                                           | NA                                                                                                                                                                                             |
| Seewann et al. (2009)       | DWI      | ADC and LFB: $r = .28$ ; ADC and PLP: $r = .16$ ; FA and LFB: $r = -.63$ , $p < .01$ ; FA and PLP: $r = -.35$ , $p < .05$                                                                                                                                                                                    | NA                                                                                                                                                                                             |
| Soustelle et al. (2019)     | DWI      | RD: All: $r = -.7$ , $p < .05$ (medial CC), $r = -.63$ , $p > .05$ (lateral CC); $r = -.21$ , $p > .05$ (CT); Controls only: $r = .38$ (medial CC), $r = .40$ (lateral CC), $r = .45$ (CT); Cuprizone only: $r = -.07$ (medial CC), $r = .14$ (lateral CC), $r = .79$ (CT);                                  | NA                                                                                                                                                                                             |
| Sundberg et al. (2010)      | DWI      | AD: $r = .4825$ , $p = .0216$ (lateral), $r = .4799$ , $p = .0282$ (dorsal); FA: $r = -.8235$ , $p = .0382$ (dorsal column of caudal zone);                                                                                                                                                                  | NA                                                                                                                                                                                             |
| Takagi et al. (2009)        | DWI      | FA: $r = .2387$ , $p = .4796$ (myelin sheath density); $r = -.6941$ , $p = .0178$ (Myelin sheath thickness)                                                                                                                                                                                                  | NA                                                                                                                                                                                             |
| Thiessen et al. (2013)      | DWI      | AD: $r = -.75$ , $p < .001$ (MSF); $r = -.89$ , $p < .01$ (MA); FA: $r = .84$ , $p < .01$ (MSF), $r = .7$ , $p < .001$ (MA); MD: $r = .81$ , $p < .01$ (MSF); $r = .81$ , $p < .01$ (MA); RD: $r = .87$ , $p < .01$ (MSF); $r = -.77$ , $p < .001$ (MA); for correlation separately for each group see paper | NA                                                                                                                                                                                             |
| Tu et al. (2016)            | DWI      | AD: $r = -.01$ ; FA: $r = .13$ , MD: $r = -.17$ , RD: $r = -.46$ ( $p < .01$ ); MTR-3.5: $r = .38$ ( $p < .01$ ), MTR-20: $r = .28$                                                                                                                                                                          | NA                                                                                                                                                                                             |
| van der Voorn et al. (2011) | DWI      | ADC: $r = -.637$ ( $p < .01$ ); FA: $r = .766$ ( $p < .01$ )                                                                                                                                                                                                                                                 | Myelin = $-13.7 + 143.9 * FA$                                                                                                                                                                  |
| van Tilborg et al. (2018)   | DWI      | FA: $R2 = .341$ , $p = .046$ (M1 motor), $R2 = .334$ , $p = .049$ (M2 motor), $R2 = .428$ , $p = .021$ (sensory)                                                                                                                                                                                             | not reported                                                                                                                                                                                   |
| Wang et al. (2009)          | DWI      | FA: $r = .681$ , $p < .01$ ; RD: $r = 0.528$ , $p < .01$ ; AD and Trace showed no significant correlation                                                                                                                                                                                                    | NA                                                                                                                                                                                             |
| Wang et al. (2015)          | DWI      | DBSI-RD: $r = -.84$ ( $p < .0001$ ), $r = -.42$ ( $p = .039$ ), $r = -.82$ ( $p < .0001$ )                                                                                                                                                                                                                   | Available for each subject - see paper                                                                                                                                                         |
| Wei et al. (2013)           | DWI      | FA: $r = .12$ , $p = .68$ (WM), $r = .61$ , $p = .32$ (GM), RD: $r = .55$ , $p = .15$ (WM), $r = .594$ , $p = .28$ (GM)                                                                                                                                                                                      | Not reported                                                                                                                                                                                   |
| Yano et al. (2018)          | DWI      | FA: $r = .87$ , $p = 3.89 \times 10^{-7}$ ; MD: $r = -.73$ , $p = 1.54 \times 10^{-4}$ ; RD: $r = -.91$ , $p = 1.04 \times 10^{-8}$                                                                                                                                                                          | NA                                                                                                                                                                                             |
| Beckmann et al. (2018)      | MT       | MTR: $R2 = .7669$ ( $p < .0001$ )                                                                                                                                                                                                                                                                            | NA                                                                                                                                                                                             |
| Bot et al. (2004)           | MT       | MTR: $r = -.76$ , $p < .001$                                                                                                                                                                                                                                                                                 | See paper                                                                                                                                                                                      |
| Duhamel et al. (2019)       | MT       | ih-MTR: between $r = .93$ and $r = .98$ , $p < .0001$ , depending on the specific sequence                                                                                                                                                                                                                   | See paper                                                                                                                                                                                      |
| Fatemi et al. (2011)        | MT       | MTR: $R2 = .695$ , $p < .0001$ ; correlations with LFB not reported                                                                                                                                                                                                                                          | not reported                                                                                                                                                                                   |
| Fjaer et al. (2013)         | MT       | MTR: $R2 = .338$ , $p < .0001$ (medial CC); $R2 = .426$ , $p < .0001$ (lateral CC); $R2 = .208$ , $p < .001$ (dGM); $R2 = .052$ , $p = .1048$ (CT)                                                                                                                                                           | intercept = $-3.002$ , slope $0.004$ (medial CC); intercept $-2.910$ , slope = $0.002$ (lateral CC); intercept = $-1.414$ , slope = $0.018$ (dGM); intercept = $-1.273$ , slope = $0.347$ (CT) |
| Fjaer et al. (2015)         | MT       | MTR and LFB: not reported. MTR and PLP: $R2 = 0.01$ , $p = .63$ (CC), $R2 = .08$ , $p = .2$ (dGM), $R2 < .01$ , $p = .97$ (CT);                                                                                                                                                                              | not reported                                                                                                                                                                                   |
| Gareau et al. (2000)        | MT       | MTR: $R2 = .45$ , $p < .001$                                                                                                                                                                                                                                                                                 | NA                                                                                                                                                                                             |
| Hakkarainen et al. (2016)   | MT       | MTR: $r = .34$ ( $p < .001$ )                                                                                                                                                                                                                                                                                | NA                                                                                                                                                                                             |
| Janve et al. (2013)         | MT       | MP: $r = .87$ (lesion), $r = .85$ (all)                                                                                                                                                                                                                                                                      | NA                                                                                                                                                                                             |
| Jelescu et al. (2016)       | MT       | MTR: $r = .32$ , $p = .1821$                                                                                                                                                                                                                                                                                 | NA                                                                                                                                                                                             |
| Kelm et al. (2016)          | MT       | not reported                                                                                                                                                                                                                                                                                                 | NA                                                                                                                                                                                             |
| Khodanovich et al. (2017)   | MT       | MP: $R2 = .897$ , $p < .001$ (all); $r = .870$ , $p = .007$ (control); $r = .927$ , $p = 0.002$ (Cuprizone)                                                                                                                                                                                                  | MP = $0.124 * \text{myelin} + 6.278$                                                                                                                                                           |
| Khodanovich et al. (2019)   | MT       | MP: $r = .90$ , $p < .001$ (CC); $r = .83$ , $p < .001$ (Caudate/putamen); $r = .80$ , $p < .001$ (Hippocampus); $r = .88$ , $p < .001$ (CT)                                                                                                                                                                 | MP = $0.4-0.6 * \text{myelin} + 6.2-7.84$<br>(slope and intercept vary depending on anatomical area)                                                                                           |

Continued on next page

Table 5: Information on the statistical results of the assessed validation studies.

| Reference                   | Modality    | Result                                                                                                                                                                                                                                                                                                                                | Linear equation                                                                                    |
|-----------------------------|-------------|---------------------------------------------------------------------------------------------------------------------------------------------------------------------------------------------------------------------------------------------------------------------------------------------------------------------------------------|----------------------------------------------------------------------------------------------------|
| Lehto et al. (2017)         | MT          | MTR: $r = .741, p < .001$ (CC), $r = .719, p = .001$ (DTT); T1sat: $r = -.741, p < .001$ (CC), $r = -.705, p = .001$ (DTT)                                                                                                                                                                                                            | NA                                                                                                 |
| Moll et al. (2011)          | MT          | MTR: $r = 0.63$ ( $p < .0001$ )                                                                                                                                                                                                                                                                                                       | NA                                                                                                 |
| Mottershead et al. (2003)   | MT          | MTR: $r = -.29$ ( $p = .075$ )                                                                                                                                                                                                                                                                                                        | NA                                                                                                 |
| Odrobina et al. (2005)      | MT          | MTR: $r = .56 \pm .22$ ( $p < .0005$ ); MP: $r = .77 \pm .15$ ( $p < .0001$ )                                                                                                                                                                                                                                                         | NA                                                                                                 |
| Reeves et al. (2015)        | MT          | MTR: $p < .005$                                                                                                                                                                                                                                                                                                                       | Not reported                                                                                       |
| Schmierer et al. (2010)     | MT          | MTR: $r = .52, p = .02$                                                                                                                                                                                                                                                                                                               | Not reported                                                                                       |
| Schmierer et al. (2004)     | MT          | MTR: $r = -.84, p < .001$                                                                                                                                                                                                                                                                                                             | NA                                                                                                 |
| Schmierer et al. (2007a)    | MT          | MP: $r = -.80, p < .001$ ; MTR: $r = -.84, p < .001$                                                                                                                                                                                                                                                                                  | NA                                                                                                 |
| Schmierer et al. (2008)     | MT          | MP: $r = -.72$ (unfixed) and $r = -.86$ (fixed), all $p < .01$ ; MTR: $r = -.83$ (unfixed) and $r = -.68$ (fixed)                                                                                                                                                                                                                     | Not reported                                                                                       |
| Seewann et al. (2009)       | MT          | MTR and LFB: $r = -.63, p < .01$ ; MTR and PLP: $r = -.27$                                                                                                                                                                                                                                                                            | NA                                                                                                 |
| Soustelle et al. (2019)     | MT          | MP: All: $r = .87, p < .05$ (medial CC), $r = .91, p < .05$ (lateral CC); $r = .89, p < .05$ (CT); Controls only: MP: $r = .36$ (medial CC), $r = .55$ (lateral CC), $r = .86$ (CT); Cuprizone only: $r = .64$ (medial CC), $r = .82$ (lateral CC), $r = .25$ (CT);                                                                   | NA                                                                                                 |
| Thiessen et al. (2013)      | MT          | MP: $r = .93, p < .001$ (MSF); $r = .81, p < .01$ (MA); MTR: $r = .72, p < .001$ (MSF); $r = .73, p < .001$ (MA); for correlation separately for each group see paper; Pearson: $r = 0.98$                                                                                                                                            | Myelin = $5.37 * MP - 0.25$                                                                        |
| Turati et al. (2015)        | MT          | MP: in C57BL/6 mice: $r = .743, p = .002$ (BGII); $r = .589, p = .023$ (MBP); in SJL/J mice: $r = .586, p = .024$ (BGII) and $r = .536, p = .042$ (MBP)                                                                                                                                                                               | NA                                                                                                 |
| Underhill et al. (2011)     | MT          | MP: $r = .99$ ( $p < .001$ ), $r = .91, p = .03$ (just GM), $r = .95, p = .0047$ (just WM); MTR: $r = .96$ ( $p < .001$ ), $r = .93, p = .021$ (just GM), $r = -.21, p = .79$ (just WM); for results on four-parameter estimation of MP, see paper                                                                                    | MP = $0.21 * myelin + 3.9$                                                                         |
| van der Voorn et al. (2011) | MT          | MTR: $r = .727$ ( $p < .01$ )                                                                                                                                                                                                                                                                                                         | Not reported                                                                                       |
| West et al. (2018)          | MT          | MWF: $R2 = .70$                                                                                                                                                                                                                                                                                                                       | MWF = $.056 * myelin + 0.014$                                                                      |
| Righart et al. (2017)       | Other       | NA                                                                                                                                                                                                                                                                                                                                    | Not reported                                                                                       |
| Soustelle et al. (2019)     | Other       | rSPF: $r = .86, p < .05$ (medial CC), $r = .76, p < .05$ (lateral CC), $r = .52, p > .05$ (CT)                                                                                                                                                                                                                                        | NA                                                                                                 |
| Argyridis et al. (2014)     | QSM         | susceptibility: $R2 = .93, p = .004$                                                                                                                                                                                                                                                                                                  | Susceptibility = $-0.14 * myelin + 0.14$                                                           |
| Hametner et al. (2018)      | QSM         | Susceptibility: $r = -.352$ ; for results separate for tissue class see paper                                                                                                                                                                                                                                                         | Susceptibility = $0.0008758 * myelin + 0.000196$                                                   |
| Lodygensky et al. (2012)    | QSM         | Susceptibility: $R2 = .673, p < .0003$ (AC); $R2 = .76, p < .0001$ (CC)                                                                                                                                                                                                                                                               | Susceptibility = $-0.0107 * myelin - 0.0017$ (AC); Susceptibility = $-0.015 * myelin + 0.004$ (CC) |
| Pol et al. (2019)           | QSM         | Susceptibility: $r = -.190, p = .723$ (caudal medial, controls), $r = -.214, p = .675$ (rostral lateral, controls), $r = .005, p = .987$ (rostral medial, controls), $r = .601, p = .141$ (caudal medial, Telfitunomide), $r = .243, p = .658$ (rostral lateral, Telfitunomide), $r = .211, p = .695$ (rostral medial, Telfitunomide) | NA                                                                                                 |
| Soni et al. (2020)          | QSM         | susceptibility: $R2 = .1, p = .02$ (only reported for 1 out of 3 ROIs)                                                                                                                                                                                                                                                                | NA                                                                                                 |
| Stüber et al. (2014)        | QSM         | Susceptibility: $p < .001$                                                                                                                                                                                                                                                                                                            | Susceptibility: slope: $-0.069 \pm 0.002$ , intercept: $-0.025 \pm 0.001$                          |
| Bagnato et al. (2018)       | Relaxometry | $R2^*$ and LFB: $r = -.09, p < .01$ (NAWM); $r = -.05, p < .01$ (DWM); $r = .99, p < .01$ (WM-Ls); $r = .83, p < .01$ (thalamus); $r = .82, p < .01$ (dGM); shadow plaques: not significant; $R2 = 0.014$ (all ROIs combined); $R2^*$ and PLP: only CT reported, $r = 0.57, p < .01$                                                  | $R2^* = 0.02 * myelin$                                                                             |
| Bot et al. (2004)           | Relaxometry | T1: $r = .71$ ( $p < .001$ ); T2: $r = .77$ ( $p < .001$ )                                                                                                                                                                                                                                                                            | See paper                                                                                          |
| Chen et al. (2017)          | Relaxometry | MWF: $r = .823, p < .001$                                                                                                                                                                                                                                                                                                             | NA                                                                                                 |

Continued on next page



Table 5: Information on the statistical results of the assessed validation studies.

| Reference                 | Modality    | Result                                                                                                                                                                                 | Linear equation                                                                                                            |
|---------------------------|-------------|----------------------------------------------------------------------------------------------------------------------------------------------------------------------------------------|----------------------------------------------------------------------------------------------------------------------------|
| Hakkarainen et al. (2016) | Relaxometry | T1: $r = .77$ ; T2: $r = .18$ ; TRAFF1: $r = .33$ ; TRAFF2: $r = .47$ ; TRAFF3: $r = .56$ ; TRAFF4: $r = .83$ ; TRAFF5: $r = .84$ (all $p < .001$ )                                    | NA                                                                                                                         |
| Hametner et al. (2018)    | Relaxometry | R2*: $r = .027$ ; T1 (log): $r = -.583$ ; for results separate for tissue class see paper                                                                                              | $R2^* = 44.7355 - 0.002942 * \text{myelin}$ ;<br>$(\log) = 7.2738 - 0.001928 * \text{myelin}$                              |
| Jelescu et al. (2016)     | Relaxometry | T2: $r = -.64$ , $p = .0024$                                                                                                                                                           | NA                                                                                                                         |
| Kelm et al. (2016)        | Relaxometry | not reported                                                                                                                                                                           | NA                                                                                                                         |
| Kozlowski et al. (2008)   | Relaxometry | MWF: $r = .64$ ( $p < .001$ ) for LFB at 3 weeks, $r = .88$ ( $p < .001$ ) for LFB at 8 weeks, $r = -.28$ ( $p = .07$ ) for MBP at 3 weeks, $r = .15$ ( $p = .40$ ) for MBP at 8 weeks | NA                                                                                                                         |
| Kozlowski et al. (2014)   | Relaxometry | MWF: $r = .63$ , $p = .0047$ (EC, in vivo), $r = .74$ , $p = .0001$ (EC, ex vivo), $r = .64$ , $p = .05$ (MBP, in vivo), $r = .63$ , $p = .038$ (MBP, ex vivo)                         | NA                                                                                                                         |
| Laule et al. (2008)       | Relaxometry | MWF: R2 between .56 and .95 (mean: .78), all $p < .0001$ ; R2 between 0 and .79 (mean R2 = .43, $p < .0001$ ) just in WM ROIs                                                          | NA                                                                                                                         |
| Laule et al. (2006)       | Relaxometry | MWF: R2 between .45 and .92 (mean .67), all $p < .0001$ ; mean R2 = .29 ( $p < .0001$ ) just in WM ROIs                                                                                | NA                                                                                                                         |
| Laule et al. (2011)       | Relaxometry | MWF and LFB: R2 between .48 and .95 (mean: .74); MWF and MBP: R2 between .15 and .47 (mean: .31)                                                                                       | NA                                                                                                                         |
| Lehto et al. (2017)       | Relaxometry | RAFF4: $r = -.742$ , $p < .0001$ (CC), $r = -.745$ , $p = .001$ (DTT)                                                                                                                  | NA                                                                                                                         |
| Mottershead et al. (2003) | Relaxometry | PD: $r = -.72$ ( $p < .001$ ); T1: $r = -.78$ ( $p < .001$ ); T2: $r = -.75$ ( $p < .001$ )                                                                                            | NA                                                                                                                         |
| Oakden et al. (2015)      | Relaxometry | MWF: $r = -.06$                                                                                                                                                                        | NA                                                                                                                         |
| Odrobina et al. (2005)    | Relaxometry | MWF: $r = .71 \pm .16$ ( $p < .001$ ); T1: $r = -.88 \pm .12$ ( $p < .0001$ ); T2: $r = -.91 \pm .08$ ( $p < .0001$ )                                                                  | NA                                                                                                                         |
| Pun et al. (2005)         | Relaxometry | MWF: $r = .77$ , T1: $r = .88$                                                                                                                                                         | NA                                                                                                                         |
| Reeves et al. (2015)      | Relaxometry | T1: R2 = .270 ( $p < .005$ ); T2: R2 = .235 ( $p < .005$ ); T2*: $p < .05$                                                                                                             | Not reported                                                                                                               |
| Schmierer et al. (2010)   | Relaxometry | T1: not reported                                                                                                                                                                       | Not reported                                                                                                               |
| Schmierer et al. (2004)   | Relaxometry | T1: $r = .70$ , $p < .001$                                                                                                                                                             | NA                                                                                                                         |
| Schmierer et al. (2007a)  | Relaxometry | T1: $r = .69$ , $p < .001$                                                                                                                                                             | NA                                                                                                                         |
| Schmierer et al. (2008)   | Relaxometry | T1: $r = .77$ (unfixed) and $r = .89$ (fixed), T2: $r = .82$ (unfixed) and $r = .92$ (fixed), all $p < .01$                                                                            | Not reported                                                                                                               |
| Seewann et al. (2009)     | Relaxometry | T1 and LFB: $r = .68$ , $p < .01$ ; T1 and PLP: $r = .41$ , $p < .05$                                                                                                                  | NA                                                                                                                         |
| Soustelle et al. (2019)   | Relaxometry | MWF: $r = .68$ , $p < .05$ (medial CC), $r = .69$ , $p < .05$ (lateral CC), $r = .20$ , $p > .05$ (CT)                                                                                 | NA                                                                                                                         |
| Stüber et al. (2014)      | Relaxometry | R1/R2*: $p < .001$ ; R2*: $r = 0.805$                                                                                                                                                  | R1: slope: $1.066 \pm 0.016$ , intercept: $1.132 \pm 0.009$ ; R2*: slope: $38.59 \pm 0.50$ , intercept: $45.86 \pm 0.29$ , |
| Thiessen et al. (2013)    | Relaxometry | T1: $r = -.66$ , $p < .001$ (MSF); $r = -.73$ (MA); for correlation separately for each group see paper                                                                                | NA                                                                                                                         |
| Warmijes et al. (2017)    | Relaxometry | R1: $r = .63 \pm .12$ ; MWF: $r = 0.74 \pm 0.11$                                                                                                                                       | R1: slope: $0.065 \pm 0.009$ ; intercept: $1.19 \pm 0.10$                                                                  |
| Webb et al. (2003)        | Relaxometry | MWF: $r = .59$ , $p < .001$ (all fibres); $r = .75$ , $p < .0001$ (healthy fibres)                                                                                                     | MWF: slope = $0.4 \pm 0.1$ (all fibres), slope = $0.7 \pm 0.1$ (healthy fibres)                                            |
| West et al. (2018)        | Relaxometry | MWF: R2 = .66                                                                                                                                                                          | MWF = $.056 * \text{myelin} + 0.014$                                                                                       |
